# More than black and white: complex relationships involving serine proteases regulate the Toll pathway and the melanization response in *Drosophila*

J.P. Dudzic<sup>1\*</sup>, M.A. Hanson<sup>1</sup>, I. Iatsenko<sup>1</sup>, S. Kondo<sup>2</sup>, and B. Lemaitre<sup>1\*</sup>

<sup>1</sup> Global Health Institute, School of Life Science, École Polytechnique Fédérale de Lausanne (EPFL), Lausanne, Switzerland.

<sup>2</sup> Invertebrate Genetics Laboratory, Genetic Strains Research Center, National Institute of Genetics, Mishima, Japan

\* Corresponding authors: J.P. Dudzic ([jandudzic@googlemail.com](mailto:jandudzic@googlemail.com)), B. Lemaitre ([bruno.lemaitre@epfl.ch](mailto:bruno.lemaitre@epfl.ch))

ORCID IDs:

Dudzic: <https://orcid.org/0000-0002-1657-6958>

Hanson: <https://orcid.org/0000-0002-6125-3672>

## Abstract:

The melanization response is a rapid and important defense mechanism in arthropods. Melanin is produced around wound sites and invading microorganisms by phenoloxidases (POs), which need to be activated by the sequential activation of an extracellular serine protease (SP) cascade. *Drosophila melanogaster* has been a useful genetic model for dissecting insect immune signaling, but understanding these proteolytic cascades has been complicated by the large number of SP genes, possibly with redundant function. Taking advantage of recently-generated null and compound mutants, we re-investigated the role of SPs involved in the melanization response in *D. melanogaster* and discovered phenotypes previously concealed in single mutant analysis. We found that two of them, Hyan and Sp7, can activate the melanization response in two different manners: Hyan is required in the local blackening of wound sites, while Sp7 regulates an alternate melanization reaction responsible for the clearance of septic infections with *Staphylococcus aureus*. We present evidence that both Sp7 and Hyan regulate the Toll NF-κB pathway. Sp7 is regulated by canonical Toll signaling downstream of PGRP-SA, ModSP, and Grass, leading to control of septic

infections via a Sp7-dependent melanization response. Additionally, we found that Hayan and the Toll-regulating SP Psh are the result of a recent gene duplication. Using genetic manipulations, we reveal the hidden role for Hayan, alongside Psh, in propagating Toll signaling downstream of pattern recognition receptors. Thus, we describe the existence of two pathways leading to the melanization response and reveal previously unknown dynamics in the activation of the Toll pathway.

## Introduction:

Sequential activation of extracellular serine protease (SP) cascades regulates important aspects of insect innate immune reactions, notably activation of the Toll pathway and the melanization response. These proteolytic cascades have a functional core, consisting of several SPs that undergo zymogen activation upon cleavage by an upstream protease. This sequential cleavage shapes the immune response by providing a link between recognition and the induction of effectors (Lemaitre and Hoffmann, 2007). In *Drosophila*, the Toll pathway mediates resistance to Gram-positive bacteria and fungi by regulating a subset of antimicrobial peptides in the fat body. Unlike mammalian Toll-like receptors that function as pattern recognition receptors, the *Drosophila* Toll receptor does not interact directly with microbial determinants and is instead activated by a cleaved form of the secreted molecule Spätzle (Spz) (Lemaitre et al., 1996; Weber et al., 2003). The immune-regulated CLIP-domain SP Spätzle processing enzyme (SPE) has been identified as the terminal SP that cleaves Spz (Jang et al., 2006). Genetic analysis supports the existence of two complex cascades that link microbial recognition to activation of SPE: the pattern recognition receptor (PRR) and Persephone (Psh) pathways. In the PRR pathway, PRRs involved in the sensing of Gram-positive bacteria (GNBP1 or PGRP-SA) or fungi (GNBP3) bind to their respective microbial ligands to activate an upstream SP, ModSP, which then leads to the activation of the SP Grass, leading to the maturation of SPE (Buchon et al., 2009; Chamy et al., 2008; Gobert, 2003; Gottar et al., 2006). In the Psh pathway, infectious agents are detected directly through the cleavage of the protease bait region of the SP Psh by microbial proteases, leading to Spz cleavage by SPE (Issa et al., 2018).

Melanization is one of the most spectacular immune reactions in insects. It is an arthropod-specific immune response resulting in the rapid deposition of the black pigment melanin at wound or infection sites (Cerenius et al., 2008; González-Santoyo and Córdoba-Aguilar, 2012; Tang, 2009). This process relies on enzymes called prophenoloxidases (PPOs), which catalyze the oxidation of phenols resulting in the polymerization of melanin. The microbicidal mechanism by which melanization contributes to the killing of bacteria, fungi or parasitoid wasp larvae remains elusive, although reports indicate a role for reactive oxygen species and other metabolic intermediates of the melanin synthesis pathway (reviewed in Nappi et al., 2009). In *D. melanogaster*, three PPOs have been identified. PPO1 and PPO2 are produced by crystal cells and contribute to hemolymph melanization, while the role of the lamellocyte-derived PPO3 is confined to encapsulation (Binggeli et al., 2014; Dudzic et al., 2015; Nam et al., 2008). Thus far, three SPs have been implicated in activating PPOs in the hemolymph: MP1, Sp7 and Hayan (Castillejo-López and Häcker, 2005; Nam et al., 2012; Tang et al., 2006). While a null mutation in *Hayan* totally abolishes melanization in adults, a null *Sp7* mutation results in only a slight reduction (Dudzic et al., 2015). The positions of these SPs in the melanization cascade has not been fully established, although Hayan and Sp7 have been shown to cleave PPO1 *in vivo* and *in vitro* (An et al., 2013; Nam et al., 2012). It is still unclear whether PPO1 and PPO2 are differentially activated by the same or by distinct SP cascades.

In many insects, the Toll and melanization pathways are activated by the same SPs, diverting only at the terminal steps (Kan et al., 2008; Park et al., 2006; Volz et al., 2006). However, a common opinion is that the SPs regulating the Toll pathway in *Drosophila* upon infection are independent of the melanization cascade and vice versa. Nevertheless, the melanization and Toll pathways interact, as the Toll pathway regulates the expression of many genes encoding SPs and serpins involved in the melanization pathway (De Gregorio, 2002; De Gregorio et al., 2002; Ligoxygakis, 2002). Moreover, there has been disparate evidence that PRRs upstream of Toll, such as PGRP-SA and GGBP1, can impact Toll-independent responses, notably melanization (Matskevich et al., 2010).

In this article, we introduce a new mode of systemic infection using a low dose of *Staphylococcus aureus* (*S. aureus*) where the survival of flies relies entirely on the

melanization response, but not on expression of antimicrobial peptides or phagocytosis. Using this sensitive assay, we show that resistance to *S. aureus* correlates with the melanization response, but surprisingly not the deposition of melanin itself. We also reveal specific roles for the SPs Sp7 and Hayan in the melanization pathway: Hayan is specifically tied to the blackening of the cuticle, while the Sp7-dependent melanization response is mediated by Toll PRR signaling, which diverges at Grass to activate either SPE or Sp7. Meanwhile, a small deficiency removing both *Hayan* and *psh* reveals an unexpected role for these two SPs in the canonical Toll pathway. We provide evidence that *Hayan* and *psh* arose from a recent gene duplication, and that these genes currently have both overlapping and distinct functions in the melanization and Toll pathways. Globally, we describe the existence of two distinct pathways leading to melanization, and reveal a previously unappreciated role for both Hayan and Psh in Toll signaling.

## Results:

### Melanization is important to survive *Staphylococcus aureus* infection

While reviewing survival data from Binggeli et al. (2014), we confirmed that survival of *D. melanogaster* adult flies against *S. aureus* is strongly dependent on a functional melanization response. Flies lacking *PPO1* rapidly succumb to infection with a low dose of *S. aureus* (OD 0.5, 1-100 CFU/fly), whereas the lack of *PPO2* alone is not critical. A synergistic effect can be observed in flies lacking both *PPO* genes simultaneously; in this case no fly survives the infection (Fig. 1A). Analysis of the bacterial load of *PPO1*<sup>Δ</sup>,*2*<sup>Δ</sup> flies reveals that melanization-deficient flies already have a higher bacterial burden 6 hours (h) after infection compared to their wild-type (*w*<sup>1118</sup>) counterparts (Fig. 1B). Their inability to control *S. aureus* growth is even more prominent 24 h after infection. Following injection of GFP-producing *S. aureus*, *PPO1*<sup>Δ</sup>,*2*<sup>Δ</sup> flies do not melanize the wound (Fig. 1C arrows) and exhibit a local GFP signal after 18 h, indicating *S. aureus* growth at the wound area (Fig. 1C). After 24 h, most *PPO1*<sup>Δ</sup>,*2*<sup>Δ</sup> flies exhibit a strong, systemic GFP signal indicating that they were unable to suppress *S. aureus* growth and spread (Fig. 1C). This contrasts with wild-type flies, which deposit melanin at the wound area and control bacterial growth over 24 h (Fig. 1D). The importance of the melanization response to resist *S. aureus* infections is further

illustrated by the observation that *PPO*<sup>1Δ,2Δ</sup> flies show no defect in Toll or IMD pathway activation after *S. aureus* infection. Compared to wild-type flies, they even show a ~7x higher expression of the Toll-activity readout *Drosomycin* (*Drs*) as well as ~8x higher expression of the IMD-activity readout *Diptericin* (*Dpt*) (Fig. S1A,B), likely due to unconstrained bacterial growth. To rule out the involvement of hemocytes in the resistance to *S. aureus*, we produced hemoless flies using a plasmatocyte-specific *gal4* (*hml<sup>Δ</sup>-Gal4*) to express the pro-apoptotic gene *bax* (Defaye et al., 2009), and additionally examined *eater*-deficient flies who exhibit a defect in *S. aureus* phagocytosis (Bretscher et al., 2015). In both cases, hemoless and *eater* deficient flies survived like the wild-type (Fig. S1C). Our results contrast with previously published data showing that hemocytes are critical to survive *S. aureus* infections via phagocytosis (Defaye et al., 2009; Garg and Wu, 2014). We attribute this discrepancy to using a low dose of *S. aureus* that is controlled specifically by the melanization response but not phagocytes.

Cytotoxic by-products of the melanization reaction include reactive oxygen species (ROS) (Nappi et al., 2009). We investigated the role of ROS during *S. aureus* infections by measuring H<sub>2</sub>O<sub>2</sub> levels in whole fly lysates using a fluorimetric approach. We did not see a change in H<sub>2</sub>O<sub>2</sub> levels over a time-span of 6 hours following *S. aureus* infection in wild-type flies. Interestingly, *PPO*<sup>1Δ,2Δ</sup> flies show a non-significant but consistent reduction in H<sub>2</sub>O<sub>2</sub> levels compared to wild-type flies (Fig. S1D).

Taken together, these results demonstrate that the melanization response is critical to resist a low dose of *S. aureus* infection consistent with a previous study (Binggeli et al., 2014). Furthermore, our *S. aureus* infection model provides a sensitive assay to characterize the role of melanization in resistance to infection.

### **Sp7 but not Hyan nor MP1 are required to resist *S. aureus* infection**

Using this low dose *S. aureus* infection model, we analyzed the role of three SPs (MP1, Sp7 and Hyan) that were previously described to be involved in melanization. For this, we used a newly generated CRISPR null mutant for *MP1* (*MP1*<sup>SK6</sup>, this study), and null mutants for *Sp7* and *Hyan* (*Sp7*<sup>SK6</sup>, *Hyan*<sup>SK3</sup>, Dudzic et al., 2015). Contradicting a previous report that used an *in vivo* RNAi approach (Tang et al., 2006), we did not observe any overt defect in Toll and PPO activation in *MP1* deficient flies, whose immune phenotype characterization is further described in Fig. S2. We therefore focused our attention on the respective roles of Hyan and Sp7. Surprisingly, only *Sp7*

mutants phenocopy the susceptibility of *PPO1<sup>Δ</sup>,2<sup>Δ</sup>* flies against *S. aureus*, while *Hayan* deficient flies behave like wild-type (Fig. 2A). By injecting GFP-producing *S. aureus* in flies lacking these serine proteases, we observed that *Sp7<sup>SK6</sup>* flies fail to restrict *S. aureus* growth first locally after 18 h, then systemically after 24 h (Fig. 2C, arrows). In contrast, *Hayan<sup>SK3</sup>* flies show no increase in GFP signal over time, indicating that *S. aureus* proliferation is controlled as in the wild type (Fig. 2D, arrows). These results were surprising since *Hayan*, but not *Sp7* mutants have reduced melanization at the wound site (hereon referred to as the “blackening” reaction) after clean injury (CI) (Fig. S2A) and *S. aureus* (Fig. 2C,D) (Dudzic et al., 2015; Nam et al., 2012). We then investigated the role of *Sp7* and *Hayan* in the melanization of the hemolymph in both adults and larvae. Extracting hemolymph with subsequent incubation at room temperature leads to blackening, due to PO-dependent melanin production. Surprisingly, hemolymph from both adults and larvae shows that *Hayan<sup>SK3</sup>* mutants fail to produce melanin, while hemolymph of *Sp7<sup>SK6</sup>* mutants turns black over time (Fig. 2B for larval hemolymph, data not shown for adults). Together, these results disconnect the blackening of the hemolymph from a melanization reaction-dependent clearance of *S. aureus*, suggesting that intermediate metabolites in the melanization reaction contribute to microbial control. Collectively, our results show that *Sp7*, but not *Hayan*, controls *S. aureus* and that the underlying resistance mechanism does not involve melanin deposition, a terminal step in the melanization cascade. This suggests that by-products of the melanization reaction, such as ROS or other metabolic intermediates, might be the active molecules controlling bacterial growth. We also reveal the complexity of the PPO cascade in *Drosophila*, pointing to the existence of multiple branches involving either *Sp7* or *Hayan*. To disentangle the deposition of melanin from the melanization reaction as a whole, we will use ‘blackening reaction’ to refer to melanin deposition and ‘melanization response’ to refer to PPO-derived activities as a whole, which includes the blackening reaction.



## Sp7 and Hayan regulate PPOs differently

Melanization is a reaction that can be triggered by clean injury or by the presence of microbial products. To further explore the relationship between the blackening reaction and the two SPs, we compared the blackening reaction at the wound site upon clean injury or septic injury with the avirulent Gram-positive bacterium *Micrococcus luteus*. For this, we categorized the blackening reaction of the cuticle into three levels: strong, weak and none. An example for each category is given in Fig. S3. For wild-type  $w^{1118}$  flies, after clean injury 91.8% blacken strongly and 8.2% blacken weakly. This ratio shifts slightly for *Sp7* mutants (66.6% strong, 30.6% weak, 2.8% none,  $p = 0.008$ , Fig. 3A grey columns), while *Hayan* mutants were almost deficient for the blackening reaction (0% strong, 38.9% weak, 61.1% none,  $p < 0.0001$ ). Interestingly, some cuticle blackening is recovered in *Hayan* mutants upon septic injury with *M. luteus* (16.2% strong, 64.6% weak, 19.2% none,  $p < 0.0001$ , Fig. 3A red columns). Thus, Hayan is not solely responsible for the blackening reaction, as the presence of bacteria can induce cuticle blackening in a Hayan-independent manner.

In *Drosophila*, two PPOs, PPO1 and PPO2, produce the bulk of hemolymph PO activity as no blackening is observed in *PPO1*, *PPO2* deficient mutants. However, it is unclear whether these PPOs are activated by the same SP or are differentially regulated. To further understand how the SPs Hayan and Sp7 relate to PPO1 and PPO2, we generated double mutants and subsequently analyzed their melanization capabilities upon clean injury and *M. luteus* infection. Previous reports have shown that mutations in *PPO1*, and to a lesser extent *PPO2*, reduce melanization upon both clean and septic injury (Binggeli et al., 2014). Here, *PPO1<sup>Δ</sup>*, *Sp7<sup>SK6</sup>* and *PPO2<sup>Δ</sup>*, *Sp7<sup>SK6</sup>* retain a blackening reaction, only slightly reduced compared to *PPO1<sup>Δ</sup>* or *PPO2<sup>Δ</sup>* alone (data not shown). This indicates that Sp7 is not essential for the blackening reaction, and that Hayan (or another SP) can activate either PPO1 or PPO2 in the absence of Sp7 (Fig. 3B). In contrast, *Hayan<sup>SK3</sup>*; *PPO1<sup>Δ</sup>* double mutants fail to blacken, even upon septic injury with *M. luteus*, which is not the case for *Hayan<sup>SK3</sup>*; *PPO2<sup>Δ</sup>* (Fig. 3B). As Hayan is not responsible for the additional blackening we see upon septic injury (Fig. 3A red), this indicates that another SP acts on PPO1, possibly Sp7, after exposure to Gram-positive bacteria. Finally, we observed that flies, double mutant for both *Hayan* and *Sp7* have strongly reduced but still detectable levels of the blackening reaction (Fig. 3C). This suggests the existence of a third, although minor, branch for activating PPO that leads to blackening of the wound site. A summary of these results is shown in Table 1.

Together, these results demonstrate that cuticle blackening after clean injury relies strongly on the presence of Hyan, acting through both PPO1 and PPO2. In the absence of Hyan, cuticle blackening can be partially restored by septic injury with the Gram-positive *M. luteus*, and this relies on PPO1 and on the presence of Sp7.

## **Extracellular components of the Toll pathway are required to activate melanization and to survive *S. aureus* infections**

Previous studies have suggested a link between the melanization and Toll pathways (Ligoxygakis, 2002; Matskevich et al., 2010), the latter being critical to resist infection to Gram-positive bacteria in *D. melanogaster* (Leulier et al., 2000; Rutschmann et al., 2000). Currently, how the Toll pathway can impact melanization is not well understood. Our finding that the Gram-positive bacteria *M. luteus* activates blackening in the absence of Hyan prompted us to investigate the role of pattern recognition receptors (PRRs) in melanization. First, we monitored the survival of flies lacking upstream or downstream components of the Toll pathway using our melanization-sensitive *S. aureus* assay. We observed that flies lacking GGBP1 or PGRP-SA, two PRRs implicated in the recognition of Gram-positive bacteria, are as susceptible to *S. aureus* infections as *PPO1<sup>Δ</sup>,2<sup>Δ</sup>* and *Sp7* mutant flies (Fig. 4A). In contrast, flies lacking GGBP3, a PRR sensitive to fungal  $\beta$ -glucans, resist as wild-type to *S. aureus* infection. Importantly, *spätzle* (*spz<sup>rm7</sup>*) flies lacking intracellular Toll signaling, exhibit wild-type resistance to *S. aureus* infection (Fig. 4B). This indicates that the high susceptibility of flies lacking PGRP-SA and GGBP1 is not linked to the intracellular Toll pathway, which regulates the Toll transcriptional output. We therefore analyzed the role of the four serine proteases upstream of Spz in the Toll pathway, ModSP, Grass, SPE, and Psh, for their role in resistance to *S. aureus*. Only *ModSP<sup>1</sup>* and *Grass<sup>Herrade</sup>* mutant flies die at similar rates to *PPO1<sup>Δ</sup>,2<sup>Δ</sup>*, *GGBP1<sup>Osiris</sup>* and *PGRP-SA<sup>seml</sup>* flies (Fig. 5A). We conclude that a subset of the extracellular components functioning upstream of the Toll ligand, namely PGRPS-SA, GGBP1, ModSP and Grass, regulate a mechanism of resistance to *S. aureus* that is independent of intracellular Toll signaling.

## **ModSP/Grass and Hyan contribute independently to different types of melanization**

A hypothesis to reconcile our data is that the PRRs GGBP1 and PGRP-SA activate ModSP and Grass, which branch out to activate the melanization pathway. This is



consistent with studies in other insects that have shown that melanization is controlled by the same SPs that regulate Toll (An et al., 2009; Kan et al., 2008). Thus, ModSP and Grass could contribute to the blackening reaction, and notably contribute to Hayan-independent cuticle blackening observed upon septic injury by *M. luteus*. To further analyze the role of ModSP in the melanization pathway and its relationship with Hayan and Sp7, we generated *Hayan<sup>SK3</sup>;;ModSP<sup>1</sup>* and *Sp7<sup>SK6</sup>,ModSP<sup>1</sup>* double mutant flies, and compared the blackening reaction at the wound site upon clean and *M. luteus* injury. In agreement with previous studies (Buchon et al., 2009), *ModSP<sup>1</sup>* mutant flies exhibit a wild-type blackening reaction in both conditions. Consistent with our hypothesis that ModSP contributes to Hayan-independent blackening, *Hayan<sup>SK3</sup>;;ModSP<sup>1</sup>* mutants failed to show cuticle blackening regardless of treatment (Fig. 5B). On the contrary, *Sp7<sup>SK6</sup>, ModSP<sup>1</sup>* mutant flies showed a similar level of blackening reaction found in *Sp7* mutants alone (Fig. 5B). We conclude that at least two independent pathways contribute to cuticle blackening in *D. melanogaster* adults: one involving Hayan and another involving PGRP-SA, GGBP1, ModSP, Grass and Sp7.

### Neither Hayan nor Sp7 alone is required to activate Toll signaling

We found that components of the Toll pathway directly regulate the melanization response. We then tested if the two SPs involved in the melanization pathway, Sp7 or Hayan, could be involved in the activation of the Toll pathway by Spätzle. Consistent with previous studies (Nam et al., 2012; Tang et al., 2006), neither *Sp7* nor *Hayan* single mutants reduce Toll pathway activation after *M. luteus* infection as monitored by the expression of *Drs* (Fig. 6A). Of note, we observed a mild overactivation of the Toll pathway in *Sp7* mutant flies upon *M. luteus* infection compared to wild-type (Fig. 6 A). Additionally, no effect on the activation of the Toll pathway could be observed in *Sp7* nor *Hayan* mutant flies upon *Candida albicans* infection (Fig. S4A). We conclude that Hayan and Sp7 alone are not required for Toll pathway activation by bacteria or fungi.

### Evidence of a close evolutionary relationship between Hayan and Psh

*Hayan* and the Toll-regulating SP *psh* are only 751 bp apart on the *D. melanogaster* X chromosome. This stimulated us to investigate the possible relationship between Hayan and Psh. We performed a phylogenetic analysis of all *D. melanogaster* CLIP-domain SPs listed in Veillard et al. (2015) using protein sequences from the conserved

catalytic domain. We found that *Hayan* and *psh* form a closely-related monophyletic lineage amongst CLIP-domain SPs (Fig. 7 A). Interestingly, it appears that *psh* is a lineage-restricted duplication found only in *Melanogaster* group flies, arising from an ancestral *Hayan* gene, the latter being conserved across the genus *Drosophila* (Fig. 7B and Fig. S5A). We found that the Psh protease “bait region”, a region prone to cleavage by pathogen proteases (Issa et al., 2018), is also present in *Hayan* (Fig. S5B). Furthermore, we recovered a striking similarity in transcript structure of *psh*-RA and *Hayan*-RA, where alternative splicing excludes the fourth exon found in *Hayan*-RB and *Hayan*-RD (Fig. 7 C). This 4<sup>th</sup> exon encodes a “*Hayan*-exclusive domain,” not found in other *D. melanogaster* CLIP-domain SPs. Nevertheless, this alternative splicing is conserved in FlyBase v2018-02 annotations for *Drosophila pseudoobscura* (subgenus *Sophophora*) (Fig. S6A), and we independently confirmed this pattern across the genus *Drosophila* using RT-PCR (Fig. S6B). Thus, alternative splicing of *Hayan* is an evolutionarily conserved mechanism to produce *Hayan* transcripts either similar to *psh*, or exclusive to *Hayan*. To shed light on the functional regions of this *Hayan*-exclusive domain, we extracted *Hayan* sequences from diverse *Drosophila* and used FEL and SLAC to infer codons under selection (Delpont et al., 2010). We found multiple sites under purifying selection ( $p < .05$ , Fig. S6C, Supplementary Data File 1), forming largely-conserved motifs corresponding to *D. melanogaster* *Hayan*-RB residues from A<sup>201</sup>-P<sup>206</sup>, R<sup>226</sup>-P<sup>234</sup>, L<sup>261</sup>-V<sup>282</sup>, and D<sup>303</sup>-G<sup>312</sup>. We did not find homologues for the *Hayan*-exclusive domain outside *Drosophila* in GenBank, UniProt, and Pfam databases. Globally, we conclude that *psh* is a recent duplication of *Hayan*, lacking the *Hayan*-exclusive domain. Furthermore, transcripts from both genes can encode highly similar proteins.

## ***Hayan* and *Psh* redundantly regulate Toll pathway activation by the PRR and *Psh* branch**

The duplication producing *Hayan* and *psh* is quite recent raising the possibility that both genes share an overlapping function that would be masked in single mutant analyses. This prompted us to analyze the combined effect of *Hayan* and *psh* mutations by generating a deficiency that removes both genes by CRISPR referred to as *Hayan-psh*<sup>Def</sup>. In these experiments, we also use a newly generated null *psh*<sup>SK1</sup> mutants. *Hayan-psh*<sup>Def</sup> mutant flies are viable and show no overt morphological defects. Strikingly, we found that *Hayan-psh*<sup>Def</sup> flies fail to activate the Toll pathway upon *M.*

*luteus* infection in contrast to single mutants (Fig. 6 B). Similarly, *Hayan-psh<sup>Def</sup>* mutants also fail to activate Toll after *C. albicans* infection and *Bacillus sp.* protease injection (Fig. S4B,C). Interestingly, while *Hayan<sup>SK3</sup>* mutants show wild type levels of *Drs* expression after protease injection, *psh<sup>SK1</sup>* flies suppress *Drs* to ~35% of wild-type levels. Only in the simultaneous absence of both Hayan and Psh is *Drs* expression suppressed to *spz<sup>rm7</sup>* levels (Fig. S4C). This suggests that Hayan also contributes to the Psh pathway. Thus, both Hayan and Psh, redundantly regulate the Toll pathway downstream of PRRs. We note that Hayan and Psh cluster phylogenetically with the SP Snake (Fig. 7A), a protease that in dorso-ventral Toll signaling cleaves the terminal SP that cleaves Spätzle (Dissing, 2001; LeMosy et al., 2001; Lindsay and Wasserman, 2014). This suggests Hayan and Psh could play a similar role upstream of SPE. Consistent with these observations, expression of an activated form of *Hayan* using a fat body Gal4 driver (*c564*) leads to upregulation of the Toll readout *Drs* in the absence of infection (Fig. 6 C), as previously shown for expression of *psh* (Jang et al., 2006). Finally, re-introduction of the *Hayan-psh* genomic region in double mutants using a Flyfos transgene (Sarav et al., 2016) rescues *Drs* expression to wild-type levels after exposure to *M. luteus* (Fig. 6 D). Collectively, our double mutant analysis reveals an unexpected role of Hayan and Psh in the pattern recognition pathway regulating Toll activity.

## Discussion:

The melanization reaction in insects is arguably one of the most striking immune reactions, resulting in a visible black spot at the site of infection. While the *Drosophila* immune response has been studied intensely, our knowledge of the melanization reaction has lagged behind. This is in part because *Drosophila* immunity has traditionally focused on immune modules conserved in mammals, but the overwhelming complexity of serine protease cascades has also prevented a clear understanding. Indeed, insect genomes harbor an incredible diversity of serine proteases, whose function remains largely uncharacterized (Cao et al., 2015; Ross et al., 2003). In this study, we provide new insights on the PO cascade and uncover a new relationship between the Toll and melanization pathways.

## Melanization is more than the blackening of the wound area

While the importance of the melanization response has been demonstrated in other insects (e.g. *Manduca sexta* (Eleftherianos et al., 2007; Lu et al., 2008)), the precise relevance of PPOs in *D. melanogaster* host defense was disputed until recently (Ayres and Schneider, 2008; Leclerc et al., 2006; Tang et al., 2006). The use of null mutations in *Drosophila* PPO genes clearly demonstrated that melanization-deficient flies lack resistance against microbes, mainly Gram-positive bacteria and fungi (Binggeli et al., 2014). In this study, we developed an infection model using a low-dose inoculation of the Gram-positive bacteria *S. aureus*, which we find is especially appropriate to study melanization. Strikingly, flies deficient for PPOs, but not flies with impaired AMP production or lacking hemocytes, rapidly succumb to this challenge. The melanization response restricts the growth of *S. aureus* preventing its systemic dissemination. Furthermore, our study shows a disconnect between resistance to infection and the blackening of the wound site. While a mutation in *Hayan* leads to the almost complete loss of the blackening reaction in adults, *Hayan* mutants do not share the susceptibility of *PPO1<sup>Δ</sup>,2<sup>Δ</sup>* flies against *S. aureus*. In contrast, *Sp7* mutant flies do not survive *S. aureus* infection, despite almost wild-type levels of cuticle and hemolymph blackening in adults. This indicates that it is not the blackening *per se* that is involved in the control of *S. aureus*, but rather other reactions downstream of PPO activity. For instance, the melanization response is associated with the production of cytotoxic molecules like ROS (reviewed in Nappi et al., 2009). Consistent with a possible role of ROS, we observed that *Sp7* mutants that are susceptible to *S. aureus* have reduced H<sub>2</sub>O<sub>2</sub> levels in total fly lysates, but this difference was not significant (Fig. S1E, p = 0.1). It is tempting to speculate that ROS or other cytotoxic intermediates contribute to host resistance to microbial infection, while melanin deposition is involved in host protection by acting as a ROS sink as proposed by other authors (Nappi et al., 2009; Riley, 1997).

### **The Toll pathway branches at the level of or downstream of *Grass* to regulate the melanization pathway**

Studies in other insects such as *Manduca sexta* and *Tenebrio molitor* have shown that melanization and the Toll pathway share a common upstream activation mechanism that then separates downstream of SPE-like SPs that are capable of cleaving both Spz and PPO (An et al., 2009; Kan et al., 2008; Kim et al., 2008). Prior to our results, there was only indirect evidence in *D. melanogaster* that the Toll pathway activates melanization (Matskevich et al., 2010). It was however noted that Toll regulates many

SPs and serpins involved in the melanization cascade at transcriptional levels (De Gregorio et al., 2001; Ligoxygakis, 2002). In addition, over-expression of several SPs functioning upstream of Spz, or a gain-of-function activation of the Toll pathway leads to spontaneous melanization (An et al., 2013; Gerttula et al., 1988; Lemaitre et al., 1995; Tang et al., 2006). Some studies have also reported that Toll PRRs can activate a host defense reaction independent of Toll intracellular signaling, possibly through melanization (Bischoff et al., 2004; Matskevich et al., 2010). Despite these sporadic observations, if and how the PRR-Toll pathway branches to PPO activation remained unknown. Here we show that PGRP-SA, GNBP1, ModSP and Grass, but not SPE, regulate the melanization response after exposure to Gram-positive bacteria. Our double mutant analysis suggests that the PRR cascade diverges downstream of Grass to activate Sp7 and PPO1. Thus, our study demonstrates a direct connection between the extracellular SPs regulating the activation of Toll and the melanization response as observed in other insects. Surprisingly, we found no clear role for MP1 in melanization nor Toll pathway activity, which contradicts a previous RNAi screen that positioned MP1 downstream of Sp7 in the PO cascade (Tang et al., 2006). At this stage, it cannot be excluded that MP1 contributes to melanization in a redundant way. Alternatively, results obtained with RNAi may be the consequence of off-target effects that shut down other SPs.

## **Hayan and Psh redundantly regulate Toll signaling downstream of the PRR pathway**

The evidence that SPE in other insect species can lead to the activation of both the Toll and melanization pathways led us to verify the roles of two melanization SPs, Hayan and Sp7, in Toll activation. Single mutants for *Hayan* and *Sp7* showed no defect in Toll pathway activation as revealed by the level of *Drosomycin* induction. Surprisingly, we found that *Hayan-psh<sup>Def</sup>* mutants fail to activate the Toll pathway regardless of the type of challenge. This points to a crucial function for these two SPs in the activation of the Toll pathway in both the protease and PRR pathways. The Psh bait region motif <sup>107</sup>GRVDVPTFGS<sup>116</sup> is critical for protease-dependent Psh cleavage in *Drosophila* S2 cells (Issa et al., 2018). This region is truncated but present in Hayan (Fig. S5), providing a mechanism for microbial proteases to cleave Hayan or Psh differently, leading to microbe-specific activation of downstream Toll. This contraction of the bait region may represent the early beginnings of sub-functionalization amongst *Hayan* and



*psh* (He et al., 2005). Indeed, using RT-PCR, the shorter *psh*-like transcripts from *Hayan* appear less abundant in *D. melanogaster* than outgroup flies where *Hayan* alone should be responsible for Toll signaling (Figure S6C).

We also show that *Hayan* and *psh* arose from a recent duplication of an ancestral *Hayan* gene. Gene duplications can have varied evolutionary outcomes, but the strong reduction of *Drs* expression in *Hayan-psh<sup>Def</sup>* mutants upon septic injury with *M. luteus*, but not in single mutants, suggests *Hayan* and *Psh* are redundant in regulating Toll signaling. Additionally, *Hayan* and *Psh* share striking similarities in a regulatory region upstream of the catalytic domain, which strongly suggests that they can be cleaved by the same upstream SPs. As both SPs also share strong similarities in their catalytic domain, they likely cleave similar downstream targets. During embryonic dorso-ventral signaling, the SP Snake regulates the Spätzle processing SP Easter (Lindsay and Wasserman, 2014). The phylogenetic relatedness of Snake and *Hayan/psh* and the relatedness of Easter and SPE (Fig 7A) suggests *Hayan* and *Psh* act upstream of SPE. We note that *spz<sup>rm7</sup>* deficient flies have lower *Drs* levels than any other mutants, except *Hayan-psh<sup>Def</sup>* mutants. As *SPE* mutants still express a residual level of *Drs* upon septic injury with *M. luteus* (Fig. S4D), there is likely another SP with the ability to process Spz, as first proposed by Yamamoto-Hino and Goto (2016). CLIP-domain SPs related to Easter and SPE are promising candidates to fulfill this role. Intriguingly, MP1 clusters phylogenetically with Easter, and has been shown to cleave Spz in *Drosophila* S2 cells (Yamamoto-Hino and Goto, 2016). Further, biochemical characterization will be needed to fully clarify the positions of *Hayan* and *Psh* in the proteolytic cascade downstream of PRRs.

## **Melanization and Toll: more than black and white**

Altogether, we propose a revised model of the extracellular SP cascades regulating melanization and the Toll pathway in *D. melanogaster* that takes the three main findings of this work into consideration: i) the existence of two different pathways activating melanization, ii) the involvement of the extracellular PRRs in the melanization reaction and, iii) the implication of both *Hayan* and *Psh* in the extracellular PRR and the *Psh* pathway regulating Toll activity (Fig. 8). According to our model, cuticle injury activates *Hayan* by an unknown pathway, which results in the deposition of melanin (blackening reaction) around the wound area through both PPO1 and PPO2. After an infection with Gram-positive bacteria, peptidoglycan can be recognized by the PRRs PGRP-



SA/GNBP1, leading to an SP cascade involving ModSP, Grass, Hyan and Psh, and SPE, resulting in Spätzle cleavage. In our model, the PRR pathway upstream of Toll branches at the level or downstream of Grass to Sp7, activating PPO1 to combat invading bacteria. Alternatively, microbial proteases and endogenous elicitors (Issa et al., 2018) can activate the Toll pathway independently of PRRs by cleaving Psh, and possibly Hyan, directly. Thus, two SPs, Hyan and Psh merge signals from both the PRR and Psh pathway, to activate a common extracellular pathway upstream of Toll. Globally, we describe a crucial role for Hyan in Toll activation that is performed redundantly alongside Psh, and describe how these proteins act downstream of both PRRs and microbial proteases to activate Toll.

The analysis of proteolytic cascades regulating the *Drosophila* immune response has been hampered by the large number of SP genes, often found in clusters in the genome. While the biochemical approaches carried out in large insects have allowed a comprehensive understanding of SP signaling cascades in moths and beetles (Kanost and Jiang, 2015), genetic approaches using single gene mutant analysis were unable to determine these cascades in *Drosophila* (Binggeli, 2013). Functional redundancy, as exemplified in our study of *Hyan* and *psh*, clarifies the shortcomings of single-gene genetic approaches. Coupling phylogenetic analysis approaches with double (or triple) compound mutant analysis can pave the way to better characterize these cascades.

## Methods

### Insects Stocks

Unless indicated otherwise, *w*<sup>1118</sup> flies were used as wild-type controls. The *PPO1*<sup>Δ</sup>, *PPO2*<sup>Δ</sup> and *PPO1*<sup>Δ,2Δ</sup>, *Relish*<sup>E20</sup> (*Rel*<sup>E20</sup>), *spätzle*<sup>rm7</sup> (*spz*<sup>rm7</sup>), *ModSP*<sup>1</sup>, *Grass*<sup>Herrade</sup> (BL: 67099), *Hyan*<sup>SK3</sup>, *SPE*<sup>SK6</sup>, *Sp7*<sup>SK6</sup>, *eater*<sup>1</sup>, *hml*<sup>Δ</sup>-*Gal4*, *c564-Gal4* (BL: 6982), *UAS-bax*, *UAS-Hyan*, *GNBP1*<sup>osiris</sup>, *GNBP3*<sup>Hades</sup>, *PGRP-SA*<sup>seml</sup> (BL: 55761) lines are described previously or obtained from Bloomington Drosophila Stock Center (Binggeli et al., 2014; Bretscher et al., 2015; Brown et al., 2001; Buchon et al., 2009; Dudzic et al., 2015; Gobert, 2003; Gottar et al., 2006; Nam et al., 2012; Neyen et al., 2014; Sinenko and Mathey-Prevot, 2004; Yamamoto-Hino and Goto, 2016). The *MP1*<sup>SK6</sup>, *psh*<sup>SK1</sup> and *Hyan-psh*<sup>Def</sup> mutant lines were generated by CRISPR/Cas9 as described in (Kondo and Ueda, 2013). *MP1*<sup>SK6</sup> harbors a 13 bp deletion from position 4308655 to 4308668 on the third chromosome. *psh*<sup>SK1</sup> harbors a 10 bp deletion from position

18485863 to 18485873 on the X chromosome. The *Df(1)Hayan,psh<sup>SK5</sup>* deficiency has a 6816 bp deletion from position 18480206 to 18487022 on the X chromosome (referred to as *Hayan-psh<sup>Def</sup>* in the text). To rescue the *Hayan-psh<sup>Def</sup>* mutant flies, transgenic flies were produced by injecting embryos with a *Hayan,psh* transgene from FlyFos (Clone CBGtg9060C0781D, Sarov et al., 2016). This transgene contains ~10 kb of genomic DNA from gene *CG15046* to *Hayan*). *Drosophila* stocks were maintained at 25°C on standard fly medium.

## Microorganism culture and infection experiments

The bacterial strains used and their respective optical density of the pellet (O.D.) at 600 nm were: the DAP-type peptidoglycan-containing Gram-positive bacteria *Bacillus subtilis* (*B. subtilis*, O.D. 5); the Lys-type peptidoglycan-containing Gram-positive bacteria *Micrococcus luteus* (*M. luteus*, O.D. 200), and *Staphylococcus aureus* (*S. aureus*, O.D. 0.5). Strains were cultured in Luria Broth (LB) at 29 °C (*M. luteus*) or 37 °C (other species). The yeast *Candida albicans* ATCC 2001 (*C. albicans*, OD 400) was cultured in YPG medium at 37 °C. Pellets were diluted in distilled water. The *S. aureus*-GFP strain is described in Needham (2004). Systemic infections (septic injury) were performed by pricking adults in the thorax with a thin needle previously dipped into a concentrated pellet of bacteria. Infected flies were subsequently maintained at 29 °C (*M. luteus*, *C. albicans*, *B. subtilis*) or at 25 °C (*S. aureus*, injection of *B. subtilis* protease). At least three tubes of 20 flies were used for each survival experiment and survival was scored once or twice daily. For lifespan experiments, flies were kept on normal fly medium at 25 °C and were flipped every two days. 18 nL of protease of *Bacillus sp.* (Sigma P0029) diluted 1:1500 in PBS was injected into the thorax for qRT-PCR experiments.

## Wounding experiment

Clean injury (CI) refers to an injury performed with an ethanol sterilized needle. A low level of bacterial contamination is still possible since the surface of the insect was not sterilized. For imaging of the blackening reaction upon pricking, the thorax of the animal was pricked (as described in infection experiments) using a sterile needle (diameter: ~5 µm). Pictures were taken 16 hours post-pricking. Third instar larvae were pricked dorsally near the posterior end, using a sterile needle (diameter: ~5 µm). Pictures of melanized larvae were taken one-hour post-injury. Pictures were

captured with a Leica M 205 FA microscope, a Leica DFC7000FT camera and the Leica Application Suite. For publication purposes, brightness and contrast were increased on some images.

### **Melanization assessment**

Flies or larvae were pricked as described and the level of blackening at the wound site, estimated by the size and color of the melanin spot, was examined 16-18 h later in adults and 3 h later in larvae. For observing the general capacity of hemolymph to melanize, hemolymph was collected from third instar (L3) larvae by dissection and transferred to a 96 well microtiter plate. After incubation at room temperature blackening was recorded by taking pictures.

### **Bacterial load of flies**

Flies were infected with *S. aureus* as described above. At the appropriate time point, flies were sacrificed by washing them in 70% ethanol. This treatment is expected to remove bacteria from the surface of the flies. Ethanol was washed off with sterile PBS and groups of five flies were homogenized with a PRECELLYS™ homogenizer in 0.2 ml PBS. The homogenate was serially diluted and plated on LB agar. After incubation at 37 °C overnight, colonies were counted and calculated to single fly CFUs. Only *S. aureus* bacterial colonies were recovered at this time point with this approach.

### **H<sub>2</sub>O<sub>2</sub> assay**

H<sub>2</sub>O<sub>2</sub> levels were assessed with Fluorimetric Hydrogen Peroxide Assay Kit (Sigma MAK165) according to the manufacturer's documentation. Briefly, seven adult flies were homogenized in 0.12 ml PBS with a PRECELLYS and then centrifuged at 4°C and 13,000 RPM. Afterwards 0.1 ml homogenate was transferred into a new tube. Sample volumes of 30 µl were used for the assay in duplicate. Protein concentration of the samples was determined using the Bradford assay and results were normalized to the respective protein levels.

### **Quantitative RT-PCR**

For quantification of mRNA, whole flies or larvae were collected at indicated time points. Total RNA was isolated from 10-15 adult flies by TRIzol reagent and dissolved

in RNase-free water. 0.5 micrograms total RNA was then reverse-transcribed in 10 µl reactions using PrimeScript RT (TAKARA) with random hexamer and oligo dT primers. Quantitative PCR was performed on a LightCycler 480 (Roche) in 96-well plates using the Applied Biosystems™ SYBR™ Select Master Mix. Primers were as follows: *Diptericin* forward 5'- GCTGCGCAATCGCTTCTACT-3', reverse 5'- TGGTGGAGTGGGCTTCATG-3'; *Drosomycin* forward 5'- CGTGAGAACCTTTTCCAATATGAT-3', reverse 5'- TCCCAGGACCACCAGCAT-3'; *RpL32 (Rp49)* forward 5'-GACGCTTCAAGGGACAGTATCTG-3', reverse 5'- AAACGCGGTTCTGCATGAG-3'.

### SP sequence analysis

A list of *Drosophila melanogaster* CLIP-domain serine proteases was generated from Veillard et al. (2015), and all *D. melanogaster* transcript isoforms were extracted from FlyBase v2018\_02 (Gramates et al., 2017). Translated catalytic domains for these SPs were aligned using MAFFT (Katoh and Standley, 2013) for maximum likelihood phylogenetic analysis using PhyML in Geneious 10.2.3 (Guindon et al., 2010; Kearse et al., 2012). Using the FlyBase genome browser, 100kb gene regions surrounding *Hayan* orthologues were extracted from various *Drosophila* species, aligned using *Hayan* as a frame of reference, and manually searched for conserved SP motifs (e.g. "LTAHC") common to all *D. melanogaster* CLIP-domain SPs. Following *Hayan* and Psh characterization, annotated *Hayan* transcripts were extracted from FlyBase and recent immune annotations of subgenus *Drosophila* flies (Hanson et al., 2016). Using these genomic and transcriptomic data, a *Hayan*-exclusive domain was extracted from diverse *Drosophila* and analyzed for signatures of selection using FEL and SLAC analyses implemented in datamonkey.org (Delpont et al., 2010; Kosakovsky Pond and Frost, 2005). We also performed these analyses for comparisons of *Hayan* to Psh. Supplementary Data File 1 accessible at <http://bit.ly/2LKintJ>.

### Statistical analysis

Each experiment was repeated independently a minimum of three times (unless otherwise indicated), error bars represent the standard deviation (s.d.) of replicate experiments (unless otherwise indicated). Statistical significance of survival data was calculated with a log-rank test compared to wild-type flies, and P-values are indicated in figure legends. Statistical significance of qPCR or ROS data was calculated with

Two-way ANOVA or Mann-Whitney test. Melanization data was analyzed with Pearson's Chi-squared test. P-values of  $< 0.05 = *$ ,  $< 0.005 = **$ , and  $< 0.0005 = ***$  were considered significant.

## Authors' contributions

JD and BL designed the study. JD performed the experiments. MH performed bioinformatic analyses. JD, MH and BL analyzed the data and wrote the manuscript. II and SK supplied critical reagents. All authors read and approved the final manuscript.

## Competing interests

The authors declare that they have no competing interests.

## Acknowledgements

We thank our colleagues Jean-Phillipe Boquete for injecting fly embryos, Claudine Neyen for comments on the manuscript, Dylan Main for technical support and the Bloomington Drosophila Stock Center for fly stocks.

## References:

- An, C., Ishibashi, J., Ragan, E.J., Jiang, H., and Kanost, M.R. (2009). Functions of *Manduca sexta* Hemolymph Proteinases HP6 and HP8 in Two Innate Immune Pathways. *Journal of Biological Chemistry* 284, 19716–19726.
- An, C., Zhang, M., Chu, Y., and Zhao, Z. (2013). Serine Protease MP2 Activates Prophenoloxidase in the Melanization Immune Response of *Drosophila melanogaster*. *PLoS ONE* 8, e79533.
- Ayres, J.S., and Schneider, D.S. (2008). A Signaling Protease Required for Melanization in *Drosophila* Affects Resistance and Tolerance of Infections. *PLoS Biology* 6, e305.
- Binggeli, O. (2013). Role and regulation of the melanization reaction in *Drosophila* immune response. EPFL.
- Binggeli, O., Neyen, C., Poidevin, M., and Lemaitre, B. (2014). Prophenoloxidase Activation Is Required for Survival to Microbial Infections in *Drosophila*. *PLoS Pathogens* 10, e1004067.
- Bischoff, V., Vignal, C., Boneca, I.G., Michel, T., Hoffmann, J.A., and Royet, J. (2004). Function of the drosophila pattern-recognition receptor PGRP-SD in the detection of Gram-positive bacteria. *Nat. Immunol.* 5, 1175–1180.

638 Bretscher, A.J., Honti, V., Binggeli, O., Burri, O., Poidevin, M., Kurucz, E., Zsamboki, J., Ando,  
639 I., and Lemaitre, B. (2015). The Nimrod transmembrane receptor Eater is required for  
640 hemocyte attachment to the sessile compartment in *Drosophila melanogaster*. *Biology*  
641 *Open*.

642 Brown, S., Hu, N., and Hombría, J.C. (2001). Identification of the first invertebrate interleukin  
643 JAK/STAT receptor, the *Drosophila* gene *domeless*. *Curr. Biol.* *11*, 1700–1705.

644 Buchon, N., Poidevin, M., Kwon, H.-M., Guillou, A., Sottas, V., Lee, B.-L., and Lemaitre, B.  
645 (2009). A single modular serine protease integrates signals from pattern-recognition  
646 receptors upstream of the *Drosophila* Toll pathway. *Proceedings of the National Academy of*  
647 *Sciences* *106*, 12442–12447.

648 Cao, X., He, Y., Hu, Y., Zhang, X., Wang, Y., Zou, Z., Chen, Y., Blissard, G.W., Kanost, M.R., and  
649 Jiang, H. (2015). Sequence conservation, phylogenetic relationships, and expression profiles  
650 of nondigestive serine proteases and serine protease homologs in *Manduca sexta*. *Insect*  
651 *Biochemistry and Molecular Biology* *62*, 51–63.

652 Castillejo-López, C., and Häcker, U. (2005). The serine protease Sp7 is expressed in blood  
653 cells and regulates the melanization reaction in *Drosophila*. *Biochemical and Biophysical*  
654 *Research Communications* *338*, 1075–1082.

655 Cerenius, L., Lee, B.L., and Söderhäll, K. (2008). The proPO-system: pros and cons for its role  
656 in invertebrate immunity. *Trends in Immunology* *29*, 263–271.

657 Chamy, L.E., Leclerc, V., Caldelari, I., and Reichhart, J.-M. (2008). Sensing of “danger signals”  
658 and pathogen-associated molecular patterns defines binary signaling pathways “upstream”  
659 of Toll. *Nature Immunology* *9*, 1165–1170.

660 De Gregorio, E. (2002). The Toll and Imd pathways are the major regulators of the immune  
661 response in *Drosophila*. *The EMBO Journal* *21*, 2568–2579.

662 De Gregorio, E., Spellman, P.T., Rubin, G.M., and Lemaitre, B. (2001). Genome-wide analysis  
663 of the *Drosophila* immune response by using oligonucleotide microarrays. *Proc. Natl. Acad.*  
664 *Sci. U.S.A.* *98*, 12590–12595.

665 De Gregorio, E., Han, S.-J., Lee, W.-J., Baek, M.-J., Osaki, T., Kawabata, S.-I., Lee, B.-L.,  
666 Iwanaga, S., Lemaitre, B., and Brey, P.T. (2002). An Immune-Responsive Serpin Regulates the  
667 Melanization Cascade in *Drosophila*. *Developmental Cell* *3*, 581–592.

668 Defaye, A., Evans, I., Crozatier, M., Wood, W., Lemaitre, B., and Leulier, F. (2009). Genetic  
669 Ablation of *Drosophila* Phagocytes Reveals Their Contribution to Both Development and  
670 Resistance to Bacterial Infection. *Journal of Innate Immunity* *1*, 322–334.

671 Delport, W., Poon, A.F.Y., Frost, S.D.W., and Kosakovsky Pond, S.L. (2010). Datamonkey  
672 2010: a suite of phylogenetic analysis tools for evolutionary biology. *Bioinformatics* *26*,  
673 2455–2457.



674 Dissing, M. (2001). Autoproteolysis and feedback in a protease cascade directing *Drosophila*  
675 dorsal-ventral cell fate. *The EMBO Journal* 20, 2387–2393.

676 Dudzic, J.P., Kondo, S., Ueda, R., Bergman, C.M., and Lemaitre, B. (2015). *Drosophila* innate  
677 immunity: regional and functional specialization of prophenoloxidas. *BMC Biology* 13.

678 Eleftherianos, I., Boundy, S., Joyce, S.A., Aslam, S., Marshall, J.W., Cox, R.J., Simpson, T.J.,  
679 Clarke, D.J., ffrench-Constant, R.H., and Reynolds, S.E. (2007). An antibiotic produced by an  
680 insect-pathogenic bacterium suppresses host defenses through phenoloxidase inhibition.  
681 *Proceedings of the National Academy of Sciences* 104, 2419–2424.

682 Garg, A., and Wu, L.P. (2014). *D. rosophila* Rab14 mediates phagocytosis in the immune  
683 response to *S. taphylococcus aureus*: Rab14 is critical for cellular immune responses to *S.*  
684 *aureus*. *Cellular Microbiology* 16, 296–310.

685 Gerttula, S., Jin, Y.S., and Anderson, K.V. (1988). Zygotic expression and activity of the  
686 *Drosophila* Toll gene, a gene required maternally for embryonic dorsal-ventral pattern  
687 formation. *Genetics* 119, 123–133.

688 Gobert, V. (2003). Dual Activation of the *Drosophila* Toll Pathway by Two Pattern  
689 Recognition Receptors. *Science* 302, 2126–2130.

690 González-Santoyo, I., and Córdoba-Aguilar, A. (2012). Phenoloxidase: a key component of  
691 the insect immune system: Biochemical and evolutionary ecology of PO. *Entomologia*  
692 *Experimentalis et Applicata* 142, 1–16.

693 Gottar, M., Gobert, V., Matskevich, A.A., Reichhart, J.-M., Wang, C., Butt, T.M., Belvin, M.,  
694 Hoffmann, J.A., and Ferrandon, D. (2006). Dual Detection of Fungal Infections in *Drosophila*  
695 via Recognition of Glucans and Sensing of Virulence Factors. *Cell* 127, 1425–1437.

696 Gramates, L.S., Marygold, S.J., Santos, G.D., Urbano, J.-M., Antonazzo, G., Matthews, B.B.,  
697 Rey, A.J., Tabone, C.J., Crosby, M.A., Emmert, D.B., et al. (2017). FlyBase at 25: looking to the  
698 future. *Nucleic Acids Res.* 45, D663–D671.

699 Guindon, S., Dufayard, J.-F., Lefort, V., Anisimova, M., Hordijk, W., and Gascuel, O. (2010).  
700 New algorithms and methods to estimate maximum-likelihood phylogenies: assessing the  
701 performance of PhyML 3.0. *Syst. Biol.* 59, 307–321.

702 Hanson, M.A., Hamilton, P.T., and Perlman, S.J. (2016). Immune genes and divergent  
703 antimicrobial peptides in flies of the subgenus *Drosophila*. *BMC Evol. Biol.* 16, 228.

704 Issa, N., Guillaumot, N., Lauret, E., Matt, N., Schaeffer-Reiss, C., Van Dorsselaer, A.,  
705 Reichhart, J.-M., and Veillard, F. (2018). The Circulating Protease Persephone Is an Immune  
706 Sensor for Microbial Proteolytic Activities Upstream of the *Drosophila* Toll Pathway.  
707 *Molecular Cell* 69, 539-550.e6.

708 Jang, I.-H., Chosa, N., Kim, S.-H., Nam, H.-J., Lemaitre, B., Ochiai, M., Kambris, Z., Brun, S.,  
709 Hashimoto, C., Ashida, M., et al. (2006). A Spätzle-processing enzyme required for toll  
710 signaling activation in *Drosophila* innate immunity. *Dev. Cell* 10, 45–55.

711 Kan, H., Kim, C.-H., Kwon, H.-M., Park, J.-W., Roh, K.-B., Lee, H., Park, B.-J., Zhang, R., Zhang,  
712 J., Söderhäll, K., et al. (2008). Molecular Control of Phenoloxidase-induced Melanin Synthesis  
713 in an Insect. *Journal of Biological Chemistry* 283, 25316–25323.

714 Kanost, M.R., and Jiang, H. (2015). Clip-domain serine proteases as immune factors in insect  
715 hemolymph. *Current Opinion in Insect Science* 11, 47–55.

716 Katoh, K., and Standley, D.M. (2013). MAFFT multiple sequence alignment software version  
717 7: improvements in performance and usability. *Mol. Biol. Evol.* 30, 772–780.

718 Kearse, M., Moir, R., Wilson, A., Stones-Havas, S., Cheung, M., Sturrock, S., Buxton, S.,  
719 Cooper, A., Markowitz, S., Duran, C., et al. (2012). Geneious Basic: an integrated and  
720 extendable desktop software platform for the organization and analysis of sequence data.  
721 *Bioinformatics* 28, 1647–1649.

722 Kim, C.-H., Kim, S.-J., Kan, H., Kwon, H.-M., Roh, K.-B., Jiang, R., Yang, Y., Park, J.-W., Lee, H.-  
723 H., Ha, N.-C., et al. (2008). A Three-step Proteolytic Cascade Mediates the Activation of the  
724 Peptidoglycan-induced Toll Pathway in an Insect. *Journal of Biological Chemistry* 283, 7599–  
725 7607.

726 Kondo, S., and Ueda, R. (2013). Highly Improved Gene Targeting by Germline-Specific Cas9  
727 Expression in *Drosophila*. *Genetics* 195, 715–721.

728 Kosakovsky Pond, S.L., and Frost, S.D.W. (2005). Not so different after all: a comparison of  
729 methods for detecting amino acid sites under selection. *Mol. Biol. Evol.* 22, 1208–1222.

730 Leclerc, V., Pelte, N., Chamy, L.E., Martinelli, C., Ligoxygakis, P., Hoffmann, J.A., and  
731 Reichhart, J.-M. (2006). Prophenoloxidase activation is not required for survival to microbial  
732 infections in *Drosophila*. *EMBO Reports* 7, 231–235.

733 Lemaitre, B., Meister, M., Govind, S., Georgel, P., Steward, R., Reichhart, J.M., and Hoffmann,  
734 J.A. (1995). Functional analysis and regulation of nuclear import of dorsal during the immune  
735 response in *Drosophila*. *EMBO J.* 14, 536–545.

736 Lemaitre, B., Nicolas, E., Michaut, L., Reichhart, J.M., and Hoffmann, J.A. (1996). The  
737 dorsoventral regulatory gene cassette *spätzle/Toll/cactus* controls the potent antifungal  
738 response in *Drosophila* adults. *Cell* 86, 973–983.

739 LeMosy, E.K., Tan, Y.-Q., and Hashimoto, C. (2001). Activation of a protease cascade involved  
740 in patterning the *Drosophila* embryo. *Proceedings of the National Academy of Sciences* 98,  
741 5055–5060.

742 Leulier, F., Rodriguez, A., Khush, R.S., Abrams, J.M., and Lemaitre, B. (2000). The *Drosophila*  
743 caspase Dredd is required to resist gram-negative bacterial infection. *EMBO Rep.* 1, 353–358.

744 Levashina, E.A., Langley, E., Green, C., Gubb, D., Ashburner, M., Hoffmann, J.A., and  
745 Reichhart, J.M. (1999). Constitutive activation of toll-mediated antifungal defense in serpin-  
746 deficient *Drosophila*. *Science* 285, 1917–1919.

747 Ligoxygakis, P. (2002). A serpin mutant links Toll activation to melanization in the host  
748 defence of *Drosophila*. *The EMBO Journal* 21, 6330–6337.

749 Lindsay, S.A., and Wasserman, S.A. (2014). Conventional and non-conventional *Drosophila*  
750 Toll signaling. *Dev. Comp. Immunol.* 42, 16–24.

751 Lu, Z., Beck, M.H., Wang, Y., Jiang, H., and Strand, M.R. (2008). The Viral Protein Egf1.0 Is a  
752 Dual Activity Inhibitor of Prophenoloxidase-activating Proteinases 1 and 3 from *Manduca*  
753 *sexta*. *Journal of Biological Chemistry* 283, 21325–21333.

754 Matskevich, A.A., Quintin, J., and Ferrandon, D. (2010). The *Drosophila* PRR GGBP3  
755 assembles effector complexes involved in antifungal defenses independently of its Toll-  
756 pathway activation function. *European Journal of Immunology* 40, 1244–1254.

757 Nam, H.-J., Jang, I.-H., Asano, T., and Lee, W.-J. (2008). Involvement of pro-phenoloxidase 3  
758 in lamellocyte-mediated spontaneous melanization in *Drosophila*. *Mol. Cells* 26, 606–610.

759 Nam, H.-J., Jang, I.-H., You, H., Lee, K.-A., and Lee, W.-J. (2012). Genetic evidence of a redox-  
760 dependent systemic wound response via Hsran Protease-Phenoloxidase system in  
761 *Drosophila*: Redox-modulated systemic wound response. *The EMBO Journal* 31, 1253–1265.

762 Nappi, A., Poirié, M., and Carton, Y. (2009). Chapter 4 The Role of Melanization and Cytotoxic  
763 By Products in the Cellular Immune Responses of *Drosophila* Against Parasitic Wasps. In  
764 *Advances in Parasitology*, (Elsevier), pp. 99–121.

765 Needham, A.J. (2004). *Drosophila melanogaster* as a model host for *Staphylococcus aureus*  
766 infection. *Microbiology* 150, 2347–2355.

767 Neyen, C., Bretscher, A.J., Binggeli, O., and Lemaitre, B. (2014). Methods to study *Drosophila*  
768 immunity. *Methods* 68, 116–128.

769 Park, J.W., Je, B.-R., Piao, S., Inamura, S., Fujimoto, Y., Fukase, K., Kusumoto, S., Söderhäll, K.,  
770 Ha, N.-C., and Lee, B.L. (2006). A synthetic peptidoglycan fragment as a competitive inhibitor  
771 of the melanization cascade. *J. Biol. Chem.* 281, 7747–7755.

772 Riley, P.A. (1997). Melanin. *Int. J. Biochem. Cell Biol.* 29, 1235–1239.

773 Ross, J., Jiang, H., Kanost, M.R., and Wang, Y. (2003). Serine proteases and their homologs in  
774 the *Drosophila melanogaster* genome: an initial analysis of sequence conservation and  
775 phylogenetic relationships. *Gene* 304, 117–131.

776 Rutschmann, S., Jung, A.C., Hetru, C., Reichhart, J.M., Hoffmann, J.A., and Ferrandon, D.  
777 (2000). The Rel protein DIF mediates the antifungal but not the antibacterial host defense in  
778 *Drosophila*. *Immunity* 12, 569–580.

779 Sarov, M., Barz, C., Jambor, H., Hein, M.Y., Schmied, C., Suchold, D., Stender, B., Janosch, S.,  
780 Kij, V.V., Krishnan, R., et al. (2016). A genome-wide resource for the analysis of protein  
781 localisation in *Drosophila*. *ELife* 5.

- Sinenko, S.A., and Mathey-Prevot, B. (2004). Increased expression of Drosophila tetraspanin, Tsp68C, suppresses the abnormal proliferation of ytr-deficient and Ras/Raf-activated hemocytes. *Oncogene* 23, 9120–9128.
- Tang, H. (2009). Regulation and function of the melanization reaction in Drosophila. *Fly* 3, 105–111.
- Tang, H., Kambris, Z., Lemaitre, B., and Hashimoto, C. (2006). Two Proteases Defining a Melanization Cascade in the Immune System of Drosophila. *Journal of Biological Chemistry* 281, 28097–28104.
- Veillard, F., Troxler, L., and Reichhart, J.-M. (2015). Drosophila melanogaster Clip-domain serine proteases: structure, function and regulation. *Biochimie*.
- Volz, J., Müller, H.-M., Zdanowicz, A., Kafatos, F.C., and Osta, M.A. (2006). A genetic module regulates the melanization response of Anopheles to Plasmodium. *Cell. Microbiol.* 8, 1392–1405.
- Weber, A.N.R., Tauszig-Delamasure, S., Hoffmann, J.A., Lelièvre, E., Gascan, H., Ray, K.P., Morse, M.A., Imler, J.-L., and Gay, N.J. (2003). Binding of the Drosophila cytokine Spätzle to Toll is direct and establishes signaling. *Nat. Immunol.* 4, 794–800.
- Yamamoto-Hino, M., and Goto, S. (2016). Spätzle-processing enzyme-independent activation of the Toll pathway in Drosophila; innate immunity. *Cell Structure and Function*.

## Tables:

**Table 1.** Melanization intensity after clean injury (CI) or septic injury with *M. luteus* in adult flies. Intensities ranging from +++ = strong to - = none. Of note: melanization is rescued by *M. luteus* in Haya flies. This is dependent on the presence of PPO1.

|                  | <i>w</i> <sup>111</sup> <sub>8</sub> | <i>Hayan</i> <sup>SK</sup> <sub>3</sub> | <i>Sp7</i> <sup>SK</sup> <sub>6</sub> | <i>MP1</i> <sup>SK</sup> <sub>6</sub> | <i>Hayan</i> <sup>SK3;PP</sup> <sub>O1<sup>Δ</sup></sub> | <i>Hayan</i> <sup>SK3;PP</sup> <sub>O2<sup>Δ</sup></sub> | <i>PPO1</i> <sub>Δ;Sp7<sup>SK</sup><sub>6</sub></sub> | <i>PPO2</i> <sub>Δ;Sp7<sup>SK</sup><sub>6</sub></sub> |
|------------------|--------------------------------------|-----------------------------------------|---------------------------------------|---------------------------------------|----------------------------------------------------------|----------------------------------------------------------|-------------------------------------------------------|-------------------------------------------------------|
| CI               | +++                                  | -                                       | ++                                    | +++                                   | -                                                        | -                                                        | ++                                                    | +                                                     |
| <i>M. luteus</i> | +++                                  | +                                       | ++                                    | +++                                   | -                                                        | +                                                        | ++                                                    | +                                                     |

## Figure legends:

**Fig. 1: PPOs contribute to the resistance of *Staphylococcus aureus*. A:** Survival rates of flies following septic injury with Gram-positive *S. aureus*. Flies lacking *PPO1* ( $P < 0.0001$ ) but not *PPO2* (n.s.) alone are less resistant than wild-type flies (*w*<sup>1118</sup>). Flies lacking two PPO genes (*PPO1*<sup>Δ</sup>,2<sup>Δ</sup>) ( $P < 0.0001$ ) show less resistance than flies lacking only *PPO1*. **B:** Persistence of *S. aureus* in *w*<sup>1118</sup> or *PPO1*<sup>Δ</sup>,2<sup>Δ</sup> flies at 2, 6 or 24 hours post-infection. Increased *S. aureus* counts are found in *PPO1*<sup>Δ</sup>,2<sup>Δ</sup> flies after 6

and 24 hours. The number of colony forming units (CFU) per fly is shown on a logarithmic scale. Data were analyzed by Mann-Whitney test and significance is indicated in the graph. **C,D:** Growth of GFP expressing *S. aureus* in *PPO1<sup>Δ</sup>,2<sup>Δ</sup>* (C) or *w<sup>1118</sup>* (D) flies after 2, 18 and 24 hours. *Wild-type* flies melanize the wound area (arrows) while *PPO1<sup>Δ</sup>,2<sup>Δ</sup>* do not. No GFP signal is observed in *w<sup>1118</sup>* flies while *PPO1<sup>Δ</sup>,2<sup>Δ</sup>* exhibit a local GFP signal after 18 hours, and systemic GFP signal after 24 hours. Exemplary micrographs are shown.

**Fig. 2: *Sp7* but not *Hayan* or *MP1* is critical to resist *S. aureus* infections. A:** Survival rates of flies following septic injury with Gram-positive *S. aureus*. Flies lacking *Sp7* ( $P < 0.0001$ ) but not *Hayan* ( $P = 0.0075$ ) or *MP1* ( $P = 0.3156$ ) are less resistant than wild-type flies (*w<sup>1118</sup>*). *PPO1<sup>Δ</sup>,2<sup>Δ</sup>* flies were used as a positive control. P-values are from log-rank tests compared to wild-type flies. **B:** Capability of L3 larval hemolymph to produce black melanin after incubation at room temperature. Hemolymph from *w<sup>1118</sup>*, *MP1<sup>SK6</sup>* and *Sp7<sup>SK6</sup>* flies shows melanization while *Hayan<sup>SK3</sup>* hemolymph fails to melanize. **C, D:** Growth of GFP producing *S. aureus* in *Sp7<sup>SK6</sup>* (B) or *Hayan<sup>SK3</sup>* (C) flies after 18 and 24 hours. *Sp7<sup>SK6</sup>* flies show a local GFP signal at the wound area (arrows) while *Hayan<sup>SK3</sup>* flies show a strong reduction. In *Sp7* mutants, this moves into a systemic GFP signal after 24 hours. Exemplary micrographs are shown.

**Fig. 3: *Sp7* and *Hayan* regulate PPOs differently.** Flies were either injured with a clean needle (black bars) or with a needle previously dipped in *M. luteus* solution (red bars). Melanization was assessed in three categories: strong, weak or none (see Fig. S2). **A:** *MP1<sup>SK6</sup>* flies do not exhibit any defect in melanization compared to *w<sup>1118</sup>* flies ( $p = 0.8219$ ). *Sp7<sup>SK6</sup>* flies show a reduction in strong melanization although almost all flies melanize at least weakly ( $p = 0.0083$ ). *Hayan<sup>SK3</sup>* flies show a strong defect in melanization after clean injury ( $p < 0.0001$ ), which can partially be rescued by wounding with *M. luteus* ( $p < 0.0001$ ). **B:** *Sp7* mutants still melanize the wound area to a certain extent with a simultaneous mutation in either *PPO1* or *PPO2*. In contrast, the partial melanization of *Hayan<sup>SK3</sup>* flies after infection with *M. luteus* relies on the presence of *PPO1*. **C:** *Hayan<sup>SK3</sup>;Sp7<sup>SK6</sup>* mutants lose most, but not all melanization. Percentages of total flies (n) are displayed. Sample size (n) is indicated in each respective bar. Data analyzed with Pearson's Chi-squared.

**Fig. 4: PRRs regulating Toll signaling are critical to resist *S. aureus*.** **A:** Survival rates of flies following septic injury with Gram-positive *S. aureus*. Flies lacking *GNBP1* ( $P < 0.0001$ ) or *PGRP-SA* ( $P < 0.0001$ ) but not *GNBP3* ( $P = 0.3141$ ) are less resistant than wild-type flies ( $w^{1118}$ ). **B:** Flies lacking the Toll ligand *Spätzle* ( $P = 0.0056$ ) or IMD component *Relish* ( $P = 0.7845$ ) resist *S. aureus* infection similar to wild-type flies ( $w^{1118}$ ). Flies lacking two PPO genes (*PPO1*<sup>Δ,2Δ</sup>) ( $P < 0.0001$ ) act as the positive control for A and B.

**Fig. 5: The Toll pathway serine proteases ModSP and Grass are required to survive *S. aureus* infections.** **A:** Survival rates of flies following septic injury with Gram-positive *S. aureus*. Flies lacking *ModSP*<sup>1</sup> ( $P < 0.0001$ ) or *Grass* ( $P < 0.0001$ ) exhibit high susceptibility compared to wild-type flies ( $w^{1118}$ ). The loss of *psh* ( $P < 0.0001$ ), *SPE* or *Spirit* ( $P < 0.0001$ ) results in a minor survival defect. P-values are from log-rank tests compared with wild-type flies. **B:** More than 90% of *ModSP*<sup>1</sup> flies melanize normally. In contrast, flies mutant for *Hayan*<sup>SK3</sup>;*ModSP*<sup>1</sup> do not melanize at all. This effect is dependent on the simultaneous absence of *Hayan* and *ModSP*<sup>1</sup> because *Sp7*<sup>SK6</sup>,*ModSP*<sup>1</sup> flies do not exhibit a stronger phenotype than *Sp7*<sup>SK6</sup> alone (see Fig. 4). Percentages of total flies are displayed, and n is indicated in each respective bar. Flies were either injured with a clean needle (black bars) or with a needle previously dipped in *M. luteus* solution (red bars). Melanization was assessed in three categories: normal, weak or none (see Fig. S2).

**Fig. 6: Hayan contributes to Toll pathway activation.** **A:** Single mutants for *Sp7* and *Hayan* show no loss of Toll pathway activity (i.e. expression of *Drosomycin* after *M. luteus* infection). *MP1*<sup>SK6</sup> and *Sp7*<sup>SK6</sup> flies show significantly higher levels of *Drs*, while *Hayan* mutants show no difference after 24 h compared to  $w^{1118}$  flies. **B:** Flies lacking *Hayan* and *psh* simultaneously fail to activate *Drs* expression similar to *spz*<sup>rm7</sup> flies, while single mutants for *Hayan* or *psh* show no significant difference compared to  $w^{1118}$  flies. **C:** Expression of a constitutively active form of *Hayan* in the fat body is sufficient to induce *Drs* in otherwise unchallenged flies. **D:** Insertion of a *Hayan*, *psh* transgene (FlyFos) rescues to wild-type levels of *Drs* expression in the *Hayan*-*psh*<sup>Def</sup> double mutant background after *M. luteus* infection. Shown are the relative expression levels of *Drs* relative to *RpL32*.  $w^{1118}$  levels after 24h (A,B,D) or UC (C) are set to 1. *spz*<sup>rm7</sup>



flies act as a negative control. Data analyzed with Mann-Whitney test (A,B, C) or 2 way Anova (E).

**Fig. 7: Evolutionarily conserved Hayan isoforms are either similar to Psh, or unique to Hayan.** **A:** Maximum likelihood phylogeny of catalytic domains from *Drosophila* CLIP-domain SPs from Veillard et al. (2015). Support values represent 100 bootstraps. Hayan and Psh form a monophyletic lineage within *D. melanogaster* CLIP-domain SPs. **B:** *psh* is a gene duplication restricted to Melanogaster group flies, derived from ancestral *Hayan* (also see Fig. S5 A). Annotations represent CDS gene regions. *Drosophila grimshawi*'s *Hayan* region is elongated due to a 4000 bp intron between Dgri\GH12343-RB exons 3 and 4. **C:** *Hayan*-RA and *psh*-RA bear a striking resemblance in transcript structure, while the *Hayan* transcript isoforms *Hayan*-RB and *Hayan*-RD include a *Hayan*-exclusive domain not found in other CLIP-domain SPs in *D. melanogaster*.

**Fig. 8: A revised model of SPs regulating the Toll pathway and the melanization reaction.** After the introduction of a wound through the cuticle and the underlying epithelium, Hayan can be activated by an unknown mechanism that results in the deposition of melanin around the wound area (left part). This Hayan-dependent blackening reaction can be achieved through both PPO1 and PPO2. If Gram-positive bacteria enter through the wound, peptidoglycan can be recognized by the PRRs PGRP-SA and GGBP1, initiating the sequential activation of the SPs ModSP, Grass Psh/Hayan and SPE. This leads to the cleavage of Spz and the activation of Toll signaling in the in the fat body (middle part). This extracellular SP pathway branches at the level of Grass to Sp7, activating PPO1 to combat invading bacteria, possibly via the production of cytotoxic intermediates but not melanin (right part). Microbial proteases can activate the Toll pathway through the Psh-SPE-Spz extracellular pathway. Although suggested by sequence homology, it is unclear whether microbial proteases can also activate Hayan but both Hayan and Psh regulate the Toll pathway downstream of Grass, ModSP and PRRs. A previous study (Yamamoto-Hino and Goto, 2016) and our data suggest the existence of another SP capable of cleaving Spz beyond SPE.

**Fig. S1: Resistance against low dose *S. aureus* infections is strongly dependent on melanization.** **A,B:** *PPO1<sup>Δ</sup>,2<sup>Δ</sup>* flies show reduction of Toll and IMD pathway activity. Expression of *Drosomycin* (A) or *Diptericin* (B) are given after septic injury with *S. aureus*. Shown are the expression levels of *Drs* or *Dpt* relative to *RpL32*. *PPO1<sup>Δ</sup>,2<sup>Δ</sup>* flies show higher levels of *Drs* after 6 and 24 h, and *Dpt* after 24 h compared to *w<sup>1118</sup>* flies. *Spätzle<sup>rm7</sup>* and *Relish<sup>E20</sup>* flies act as negative control. Data were analyzed with two-way ANOVA, only P-values for *PPO1<sup>Δ</sup>,2<sup>Δ</sup>* compared to respective *w<sup>1118</sup>* timepoints are indicated. Values represent the mean ± standard deviation of at least three independent experiments. **C:** Survival rates of flies following septic injury with Gram-positive *S. aureus*. Flies lacking the hemocyte receptor *Eater*, important for phagocytosis of *S. aureus* (P = 0.10) or flies lacking plasmatocytes by overexpressing the pro-apoptic gene *bax* (P = 0.5118) are as resistant as wild-type flies (*w<sup>1118</sup>*). P-values are from log-rank tests compared to wild-type flies. **D:** H<sub>2</sub>O<sub>2</sub> measured in whole fly lysates from flies infected with *S. aureus* after 2 and 6 hours compared to unchallenged flies. No significant differences were found between *PPO1<sup>Δ</sup>,2<sup>Δ</sup>* and *w<sup>1118</sup>* samples, although *PPO1<sup>Δ</sup>,2<sup>Δ</sup>* samples show a trend towards lower values. **E:** H<sub>2</sub>O<sub>2</sub> measured in whole fly lysates from flies infected with *S. aureus* after 2 hours. No significant differences were found between *w<sup>1118</sup>*, *Sp7<sup>SK6</sup>* and *Hayan<sup>SK3</sup>* samples, although *Sp7<sup>SK6</sup>* samples have lower values. Data analyzed with two-way ANOVA for D and E.

**Fig. S2: *MP1* deficient flies show no over defect in Melanization** **A:** Blackening of the wound area after clean injury in adult flies is only abolished in *Hayan<sup>SK3</sup>* and *PPO1<sup>Δ</sup>,2<sup>Δ</sup>* flies, while in larvae *Hayan* mutants show a strong defect and *Sp7* mutants a total loss of melanization. All SP mutants show melanized crystal cells after heating. **B:** No severe lifespan defect can be observed in all SPs mutant flies compared to *w<sup>1118</sup>*. *Hayan<sup>SK3</sup>* flies show a slight reduction in the median survival value from *w<sup>1118</sup>* 49 days to *Hayan<sup>SK3</sup>* 45 days (P = 0.0186), while differences between *MP1<sup>SK6</sup>* or *Sp7<sup>SK6</sup>* and *w<sup>1118</sup>* do not reach significance. The x-axis is the survival time in days and the y-axis is the percentage of living flies. P-values from log-rank test. **C:** Crystal cell counts after heating L3 larvae reveal no significant differences between *Sp7<sup>SK6</sup>* or *MP1<sup>SK6</sup>* and *w<sup>1118</sup>*

numbers, while *Hayan*<sup>SK3</sup> crystal cell numbers are around twice as high compared to wild type. Data analyzed with unpaired t-test.

**Fig. S3: Illustration of melanization intensities used for categories.** Flies (*w*<sup>1118</sup>: strong, weak or *PPO1*<sup>Δ</sup>,<sup>2Δ</sup>: none) were injured with a clean needle. Intensities are categorized as normal, weak, or no melanization.

**Fig. S4: *Hayan*, *psh* mutant flies have reduced *Drs* expression upon *C. albicans* or protease injection.** **A:** Neither *MP1*<sup>SK6</sup>, *Sp7*<sup>SK6</sup> nor *Hayan*<sup>SK3</sup> fail to activate *Drs* expression after being infected with *C. albicans* relative to *w*<sup>1118</sup> induction (set to 1). **B:** *Hayan*,*psh* mutants fail to activate the Toll pathway after *C. albicans* infection. **C:** *Hayan*<sup>SK3</sup> shows *w*<sup>1118</sup> levels of *Drs* expression after injection of purified *Bacillus sp.* protease. In contrast, *psh*<sup>SK1</sup> flies suppress *Drs* to ~35% of wild-type levels. *Drs* expression in *Hayan-psh*<sup>Def</sup> is suppressed to a level similar to *spz*<sup>rm7</sup> flies. **D:** *SPE*<sup>SK6</sup>, *Hayan*<sup>SK3</sup>;;*SPE*<sup>SK6</sup> and *psh*<sup>SK1</sup>;;*SPE*<sup>SK6</sup> mutants block *Drs* expression but not as completely as *spz*<sup>rm7</sup> flies. Shown are the expression levels of *Drs* relative to *RpL32*. *spz*<sup>rm7</sup> flies act as a negative control. Results for three (A,B,D) or two (C) individual experiments are shown.

**Fig. S5: *Hayan* and *Psh* are two related serine proteases.** **A:** Maximum likelihood phylogeny of unique CDS regions from *Drosophila* *Hayan* and *Psh* isoforms. Support values represent 100 bootstraps. *Psh* forms a paraphyletic lineage nested within *Drosophila* *Hayan*, with branching patterns largely matching known sorting of *Drosophila* groups. Orange stars indicate the expansion of the microbial protease bait region seen in *D. melanogaster* *Psh*<sup>114</sup>FGS<sup>116</sup> (Fig. S5 B), and translucent stars indicate reversion to the ancestral *Hayan* bait region similar to *D. melanogaster* *Hayan*. **B:** *Hayan* also encodes the protease bait region described by Issa et al. (2018). The important bait motif corresponding to *Psh*<sup>108</sup>RVDVP<sup>112</sup> is largely conserved in outgroup *Hayan* sequences, while *Melanogaster* group *Hayan* has diverged to an RVXLP motif. Interestingly, *D. ananassae* *Psh* has lost the expanded bait region (following the RVDVP motif), instead retaining these extra cleavage sites in *D. ananassae* *Hayan*. Following this bait region, the *Hayan* and *Psh* pre-catalytic domain is remarkably well-conserved, with some lineage-specific additional sites directly upstream of the Peptidase S1 catalytic domain.

983

984 **Fig. S6: Alternative isoforms of *Hayan* are conserved throughout *Drosophila*. A:**

985 Alternate *Hayan* isoforms are conserved outside the *Melanogaster* group in Flybase

986 annotations for *D. pseudoobscura* GA19543. **B:** Independent RT-PCR of *Drosophila*

987 species cDNA shows alternate *Hayan* isoforms in *D. melanogaster* and the subgenus

988 *Drosophila* flies *D. mojavensis* and *D. virilis*. **C:** Codon-alignment of the *Hayan*-exclusive

989 domain from diverse *Drosophila*. Green bars represent motifs with many residues

990 under purifying selection (Supplementary Data File 1), which also display strong

991 conservation of sequence (black residues in alignment). Notably, *Drosophila*

992 *mojavensis* lacks most conserved motifs in its *Hayan*-exclusive domain, and this region

993 is difficult to interpret with available sequence data in the related *Drosophila buzzatii*.

# Fig. 1

**A**

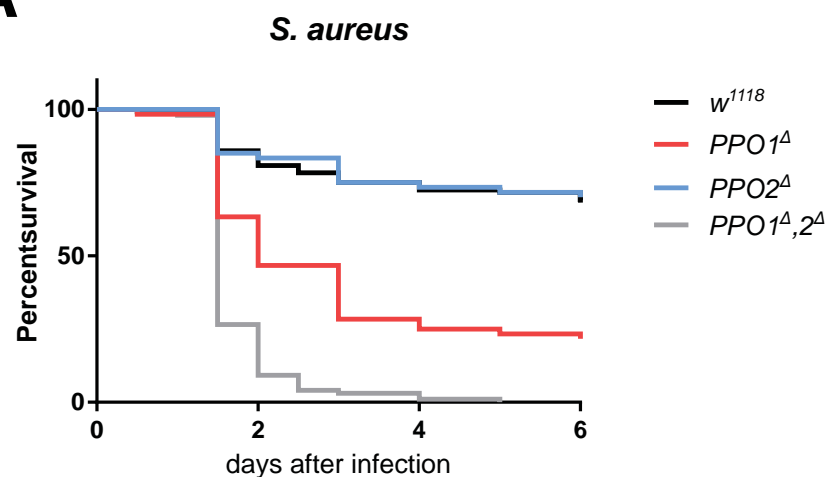

**B**

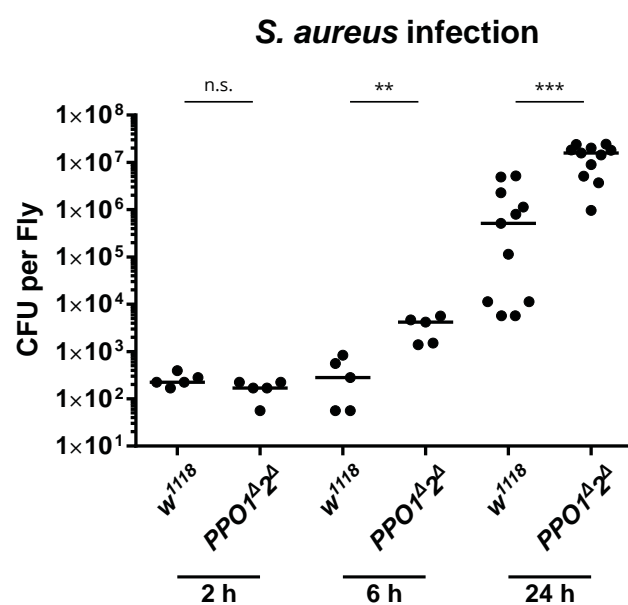

**C**

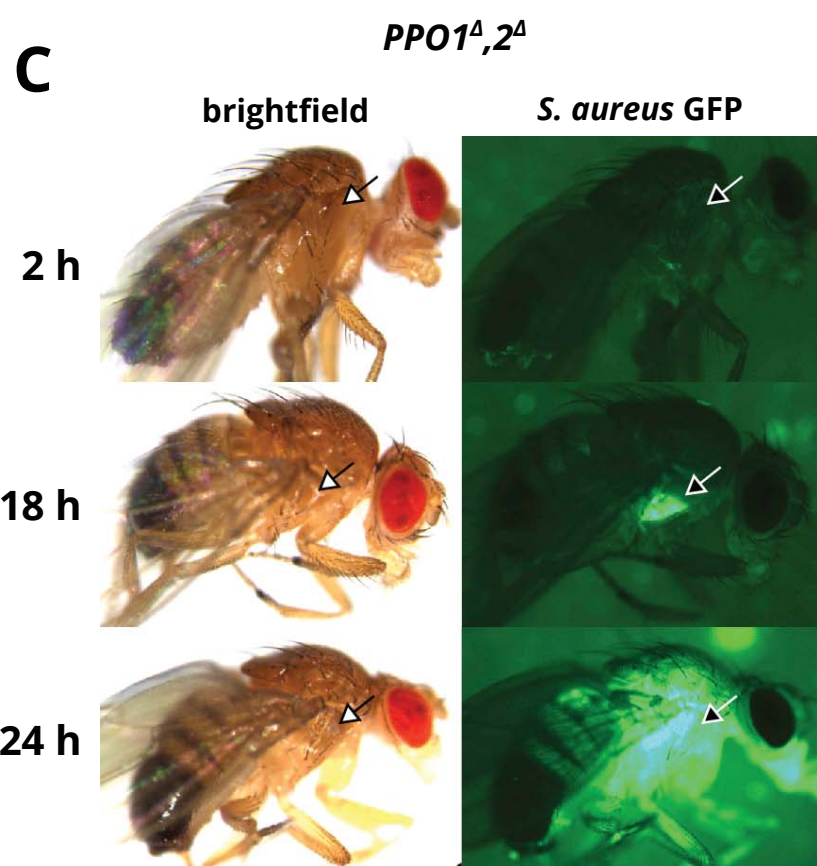

**D**

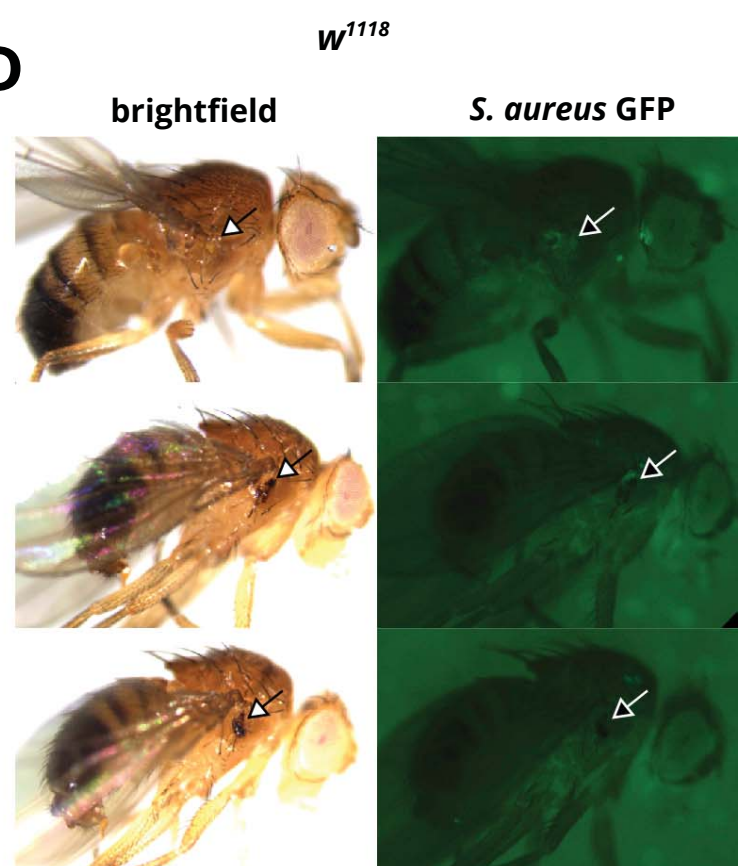



**Fig. 2**

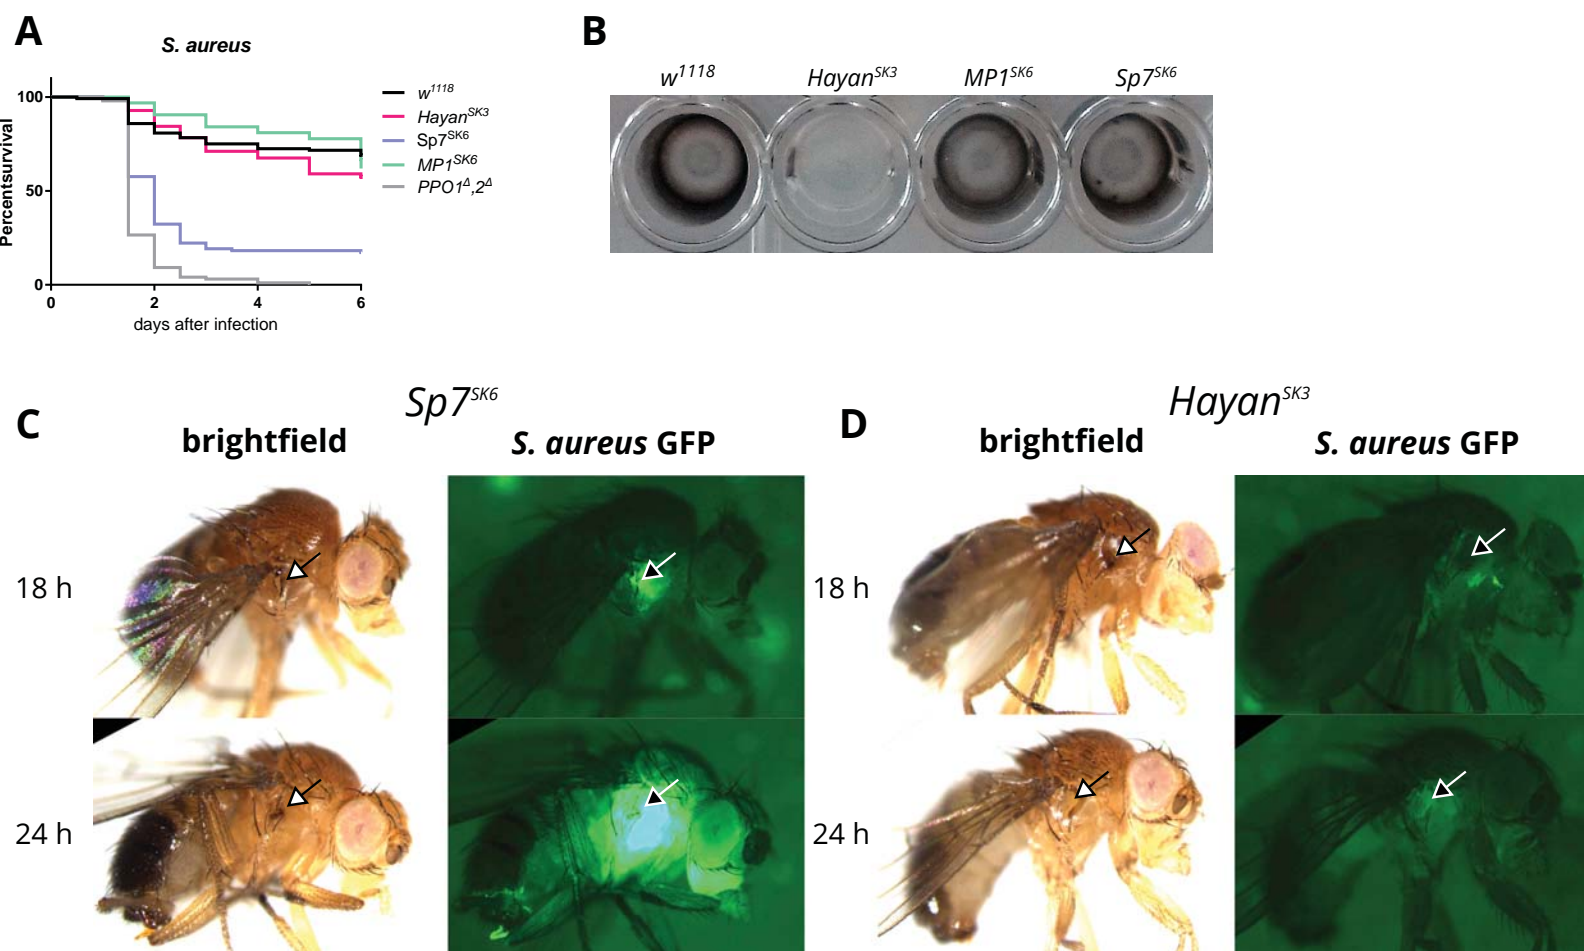



Fig. 3

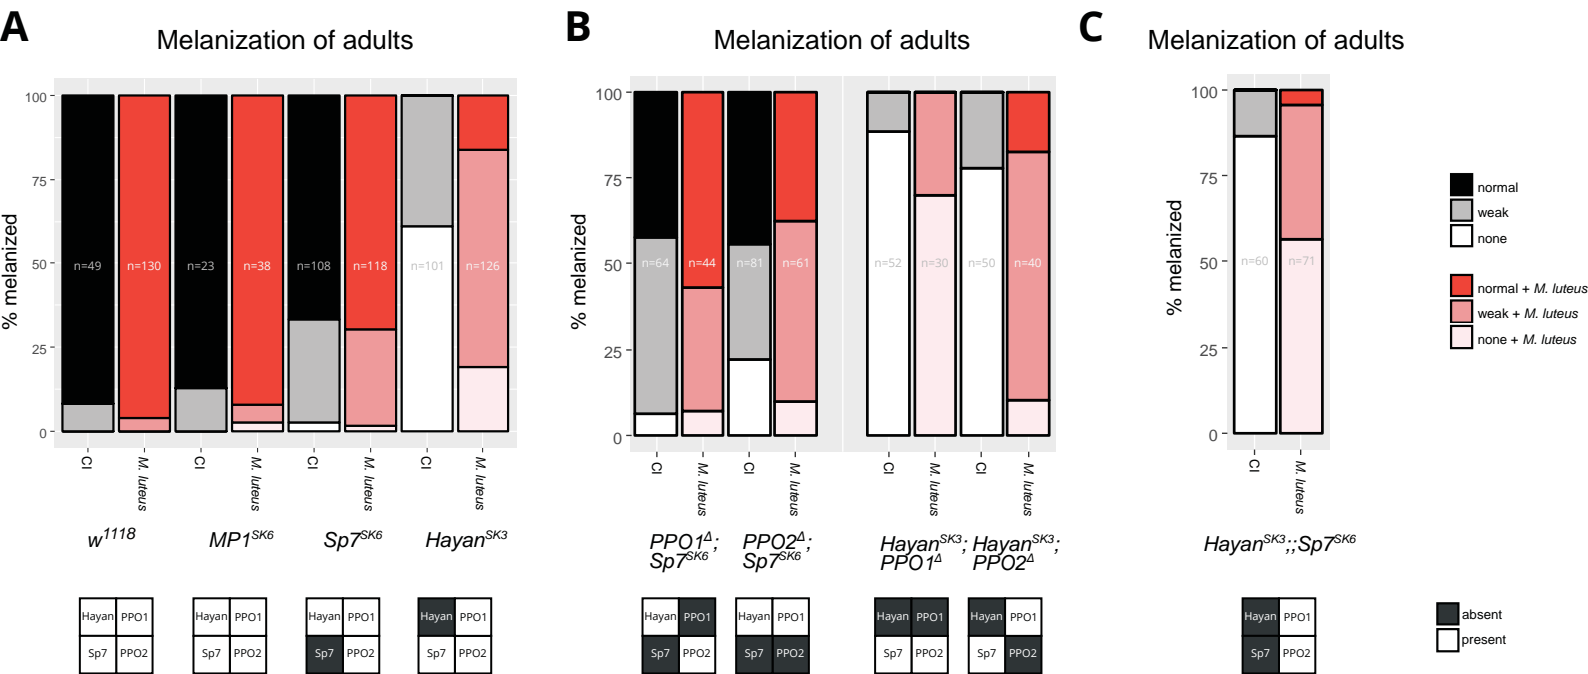

**Fig. 4**

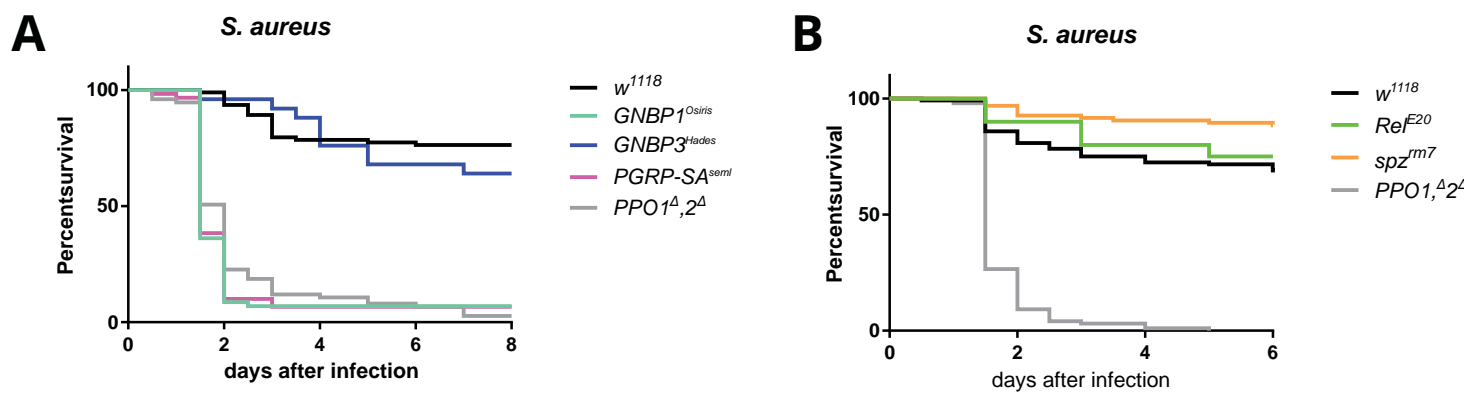

Fig. 5

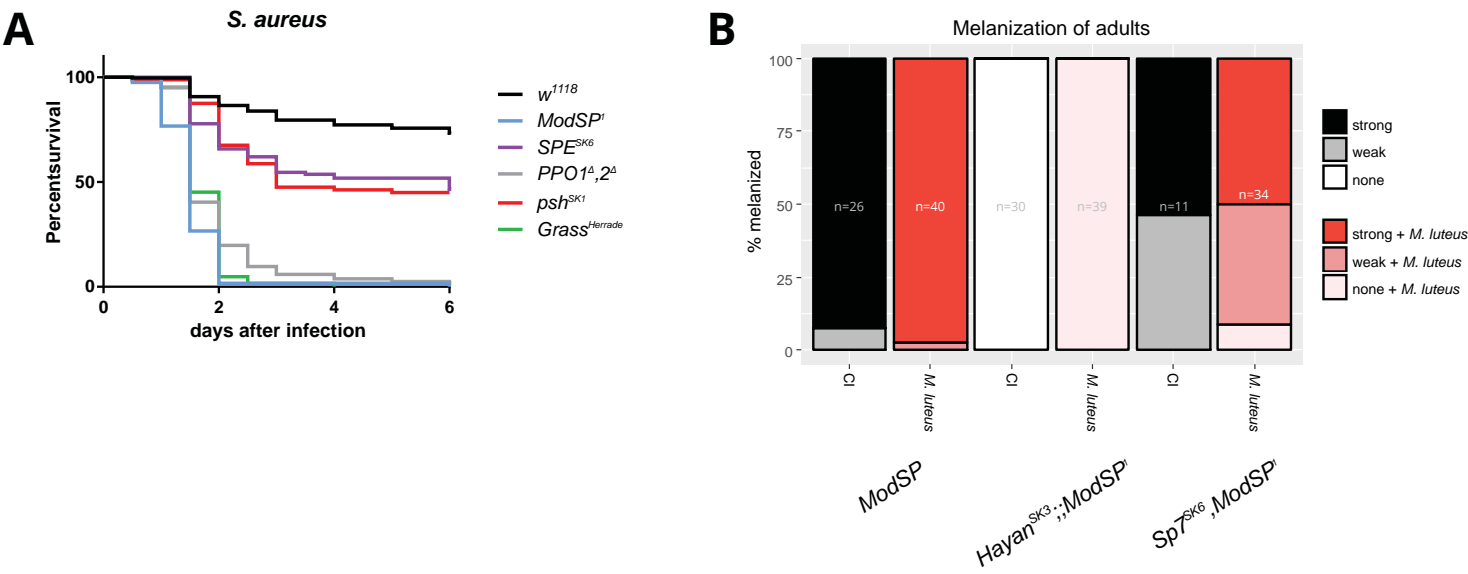

# Fig. 6

**A**

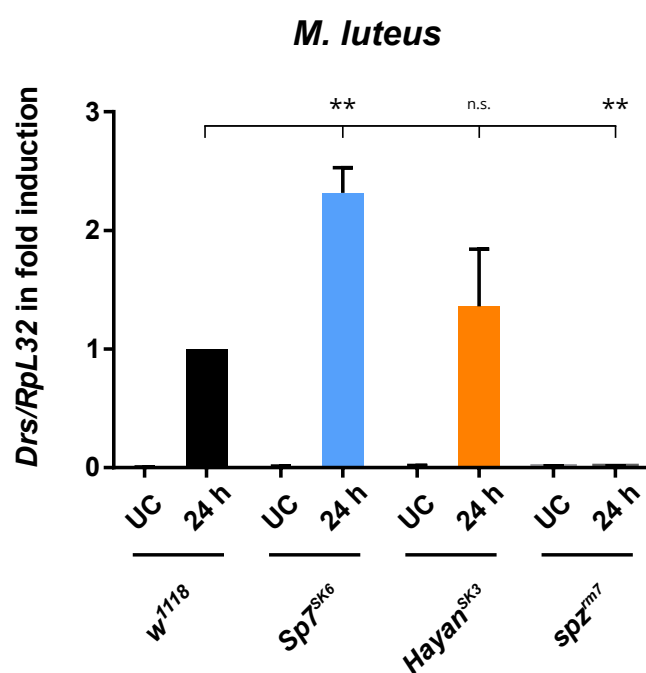

**B**

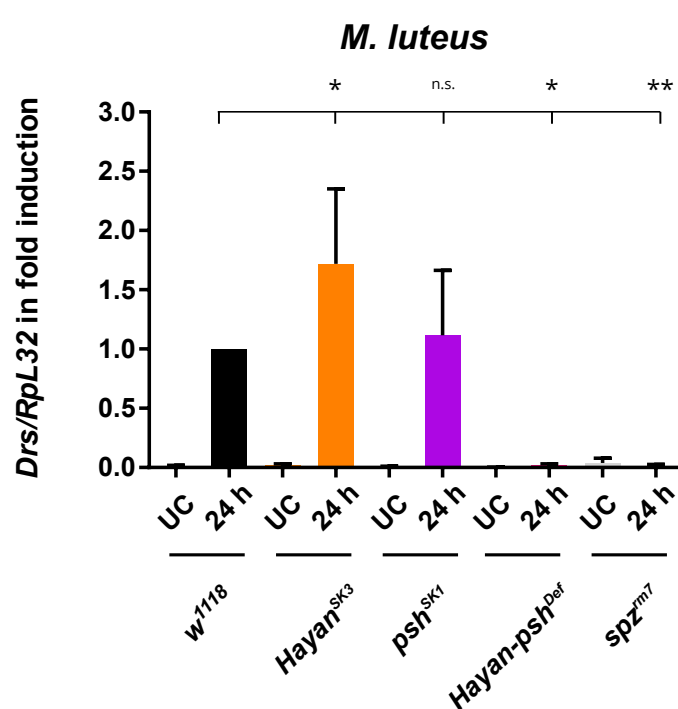

**C**

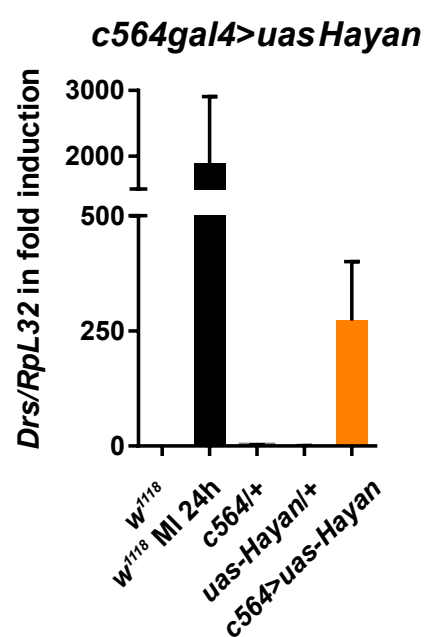

**D**

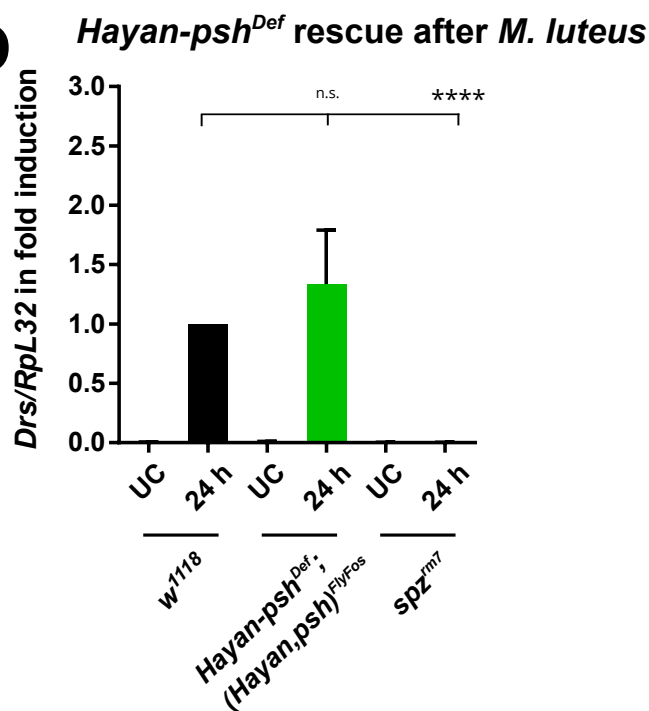

**Fig. 7**

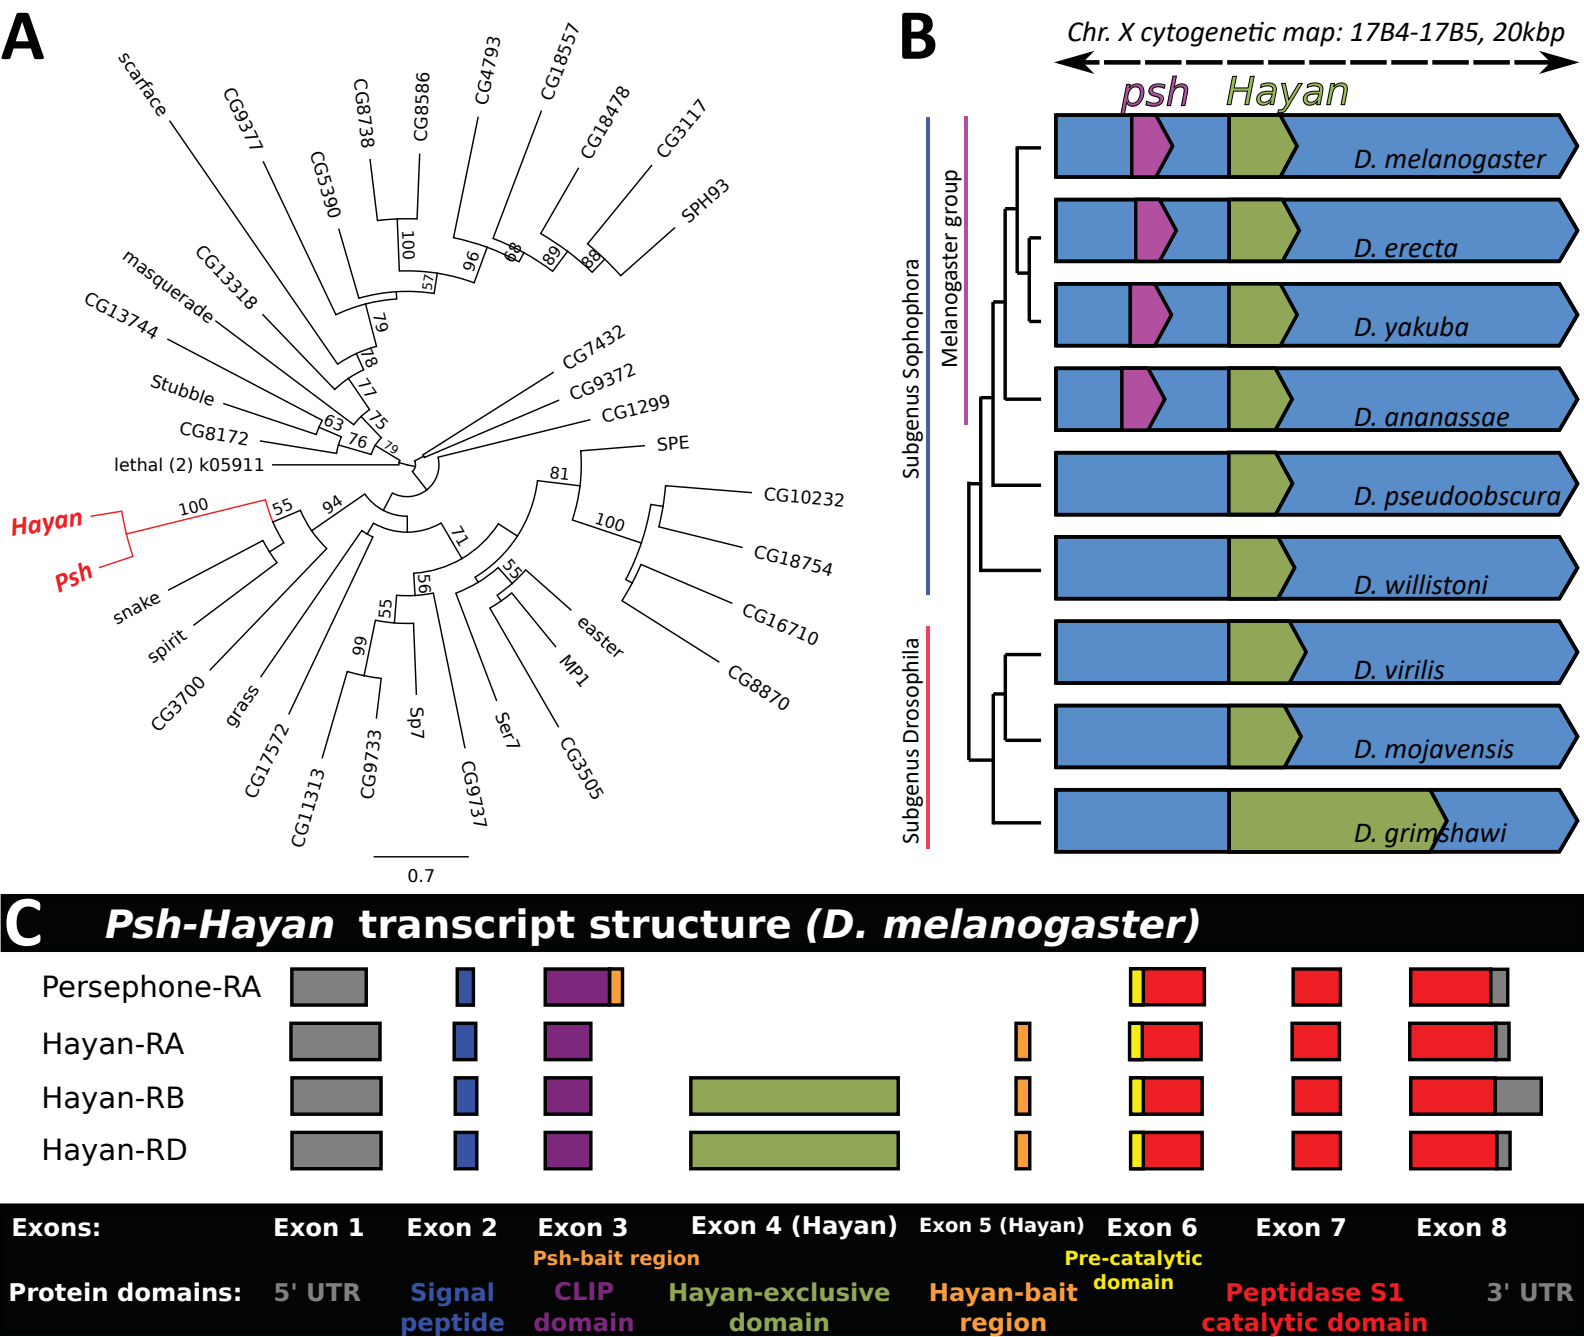

## Fig. 8

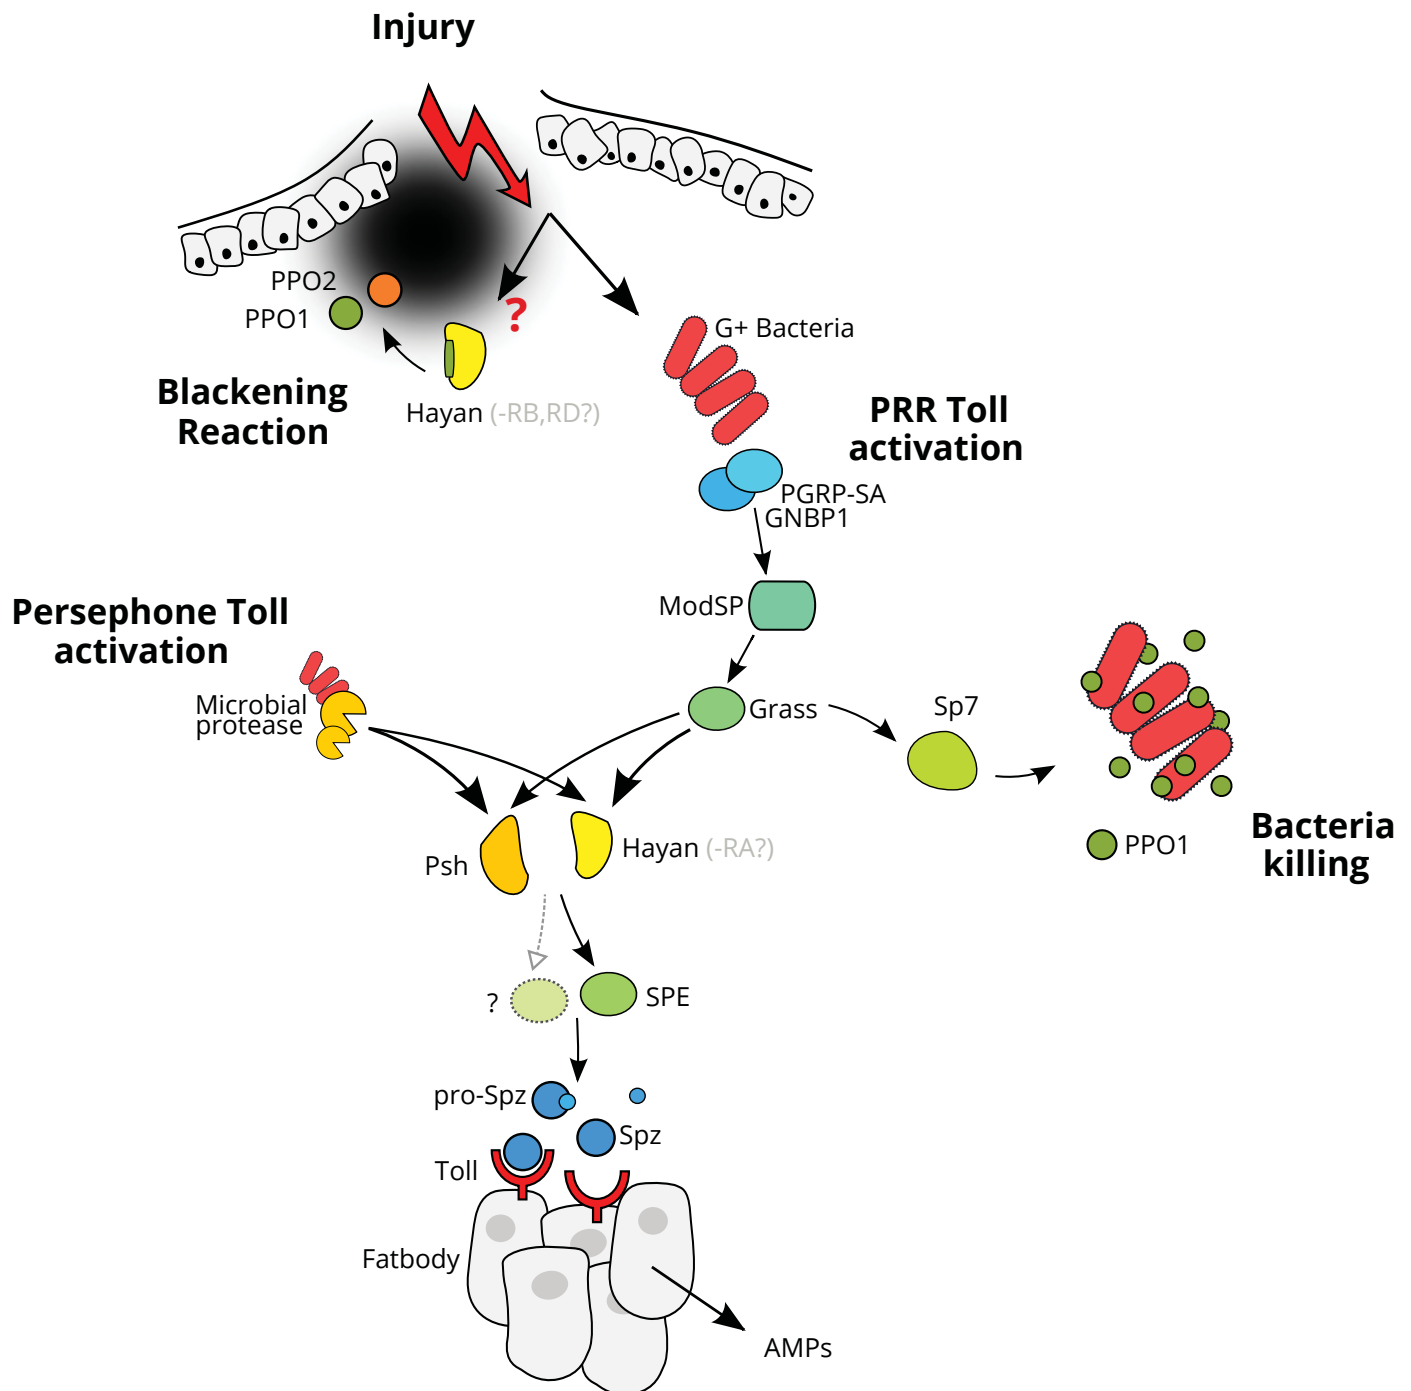



Fig. S1

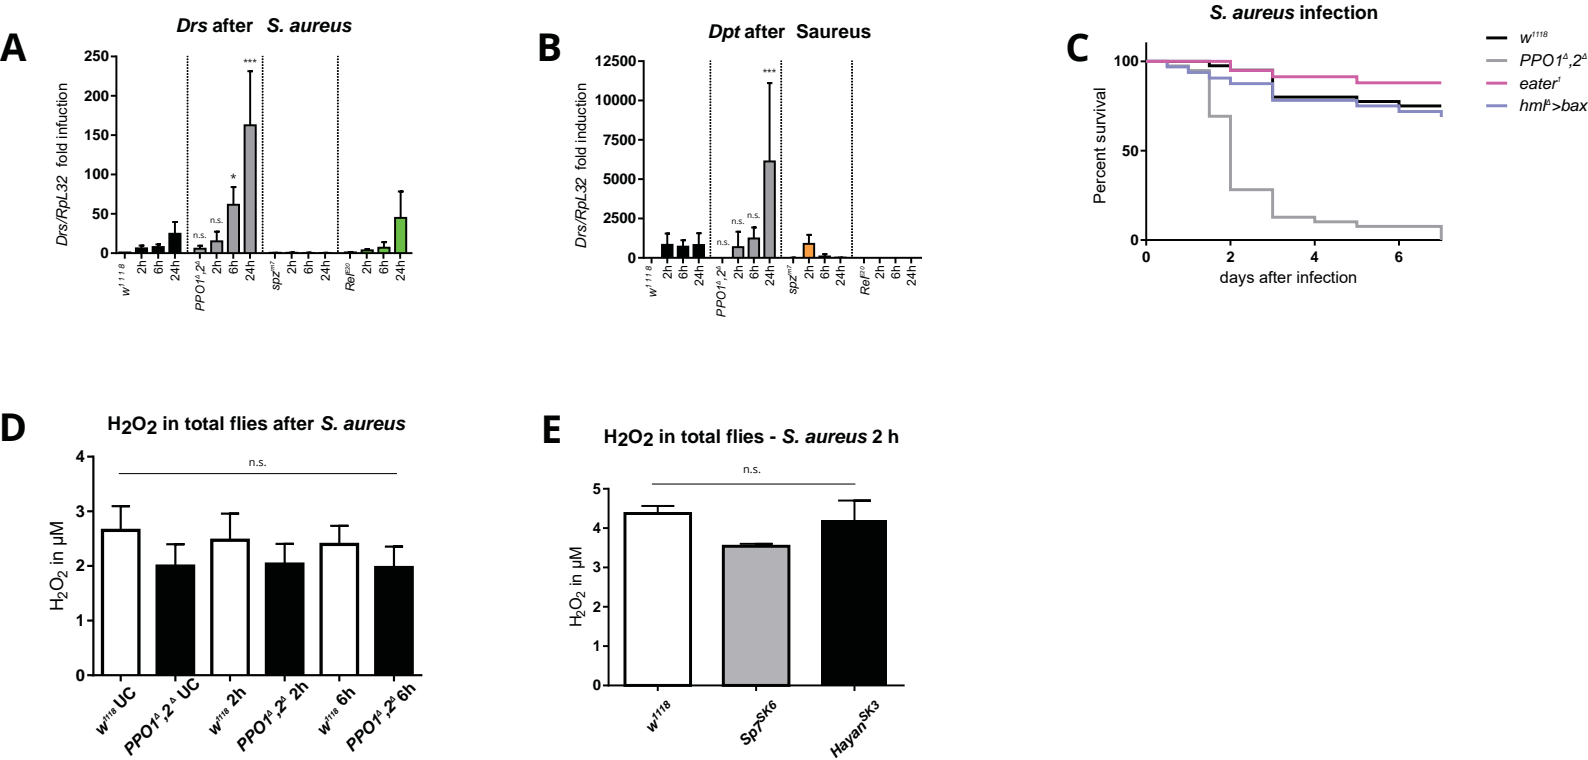

## Fig. S2

**A**

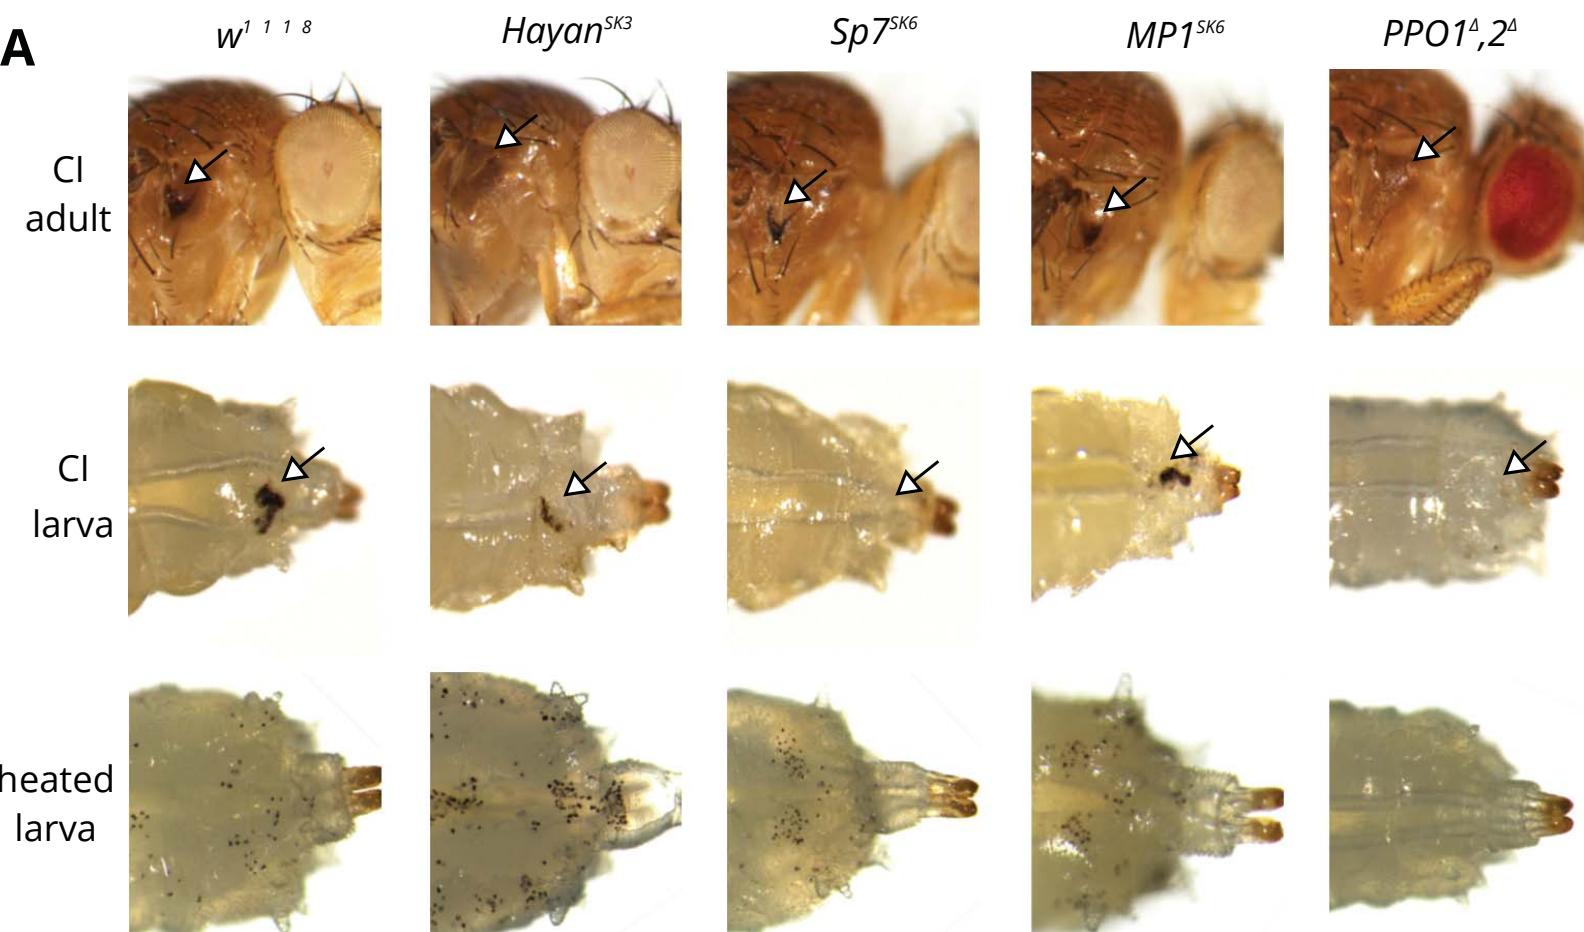

**B**

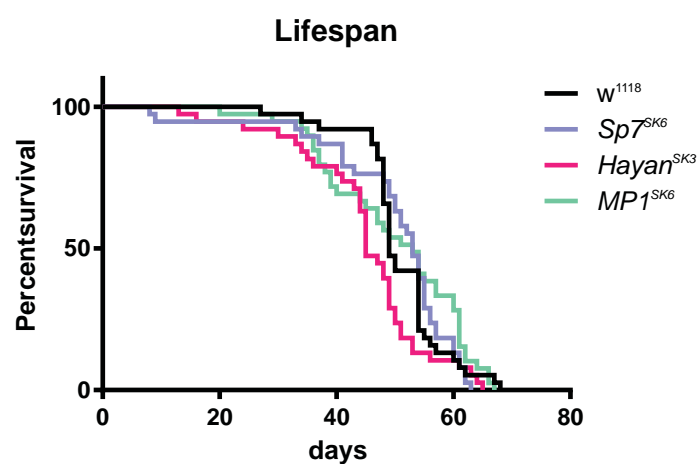

**C**

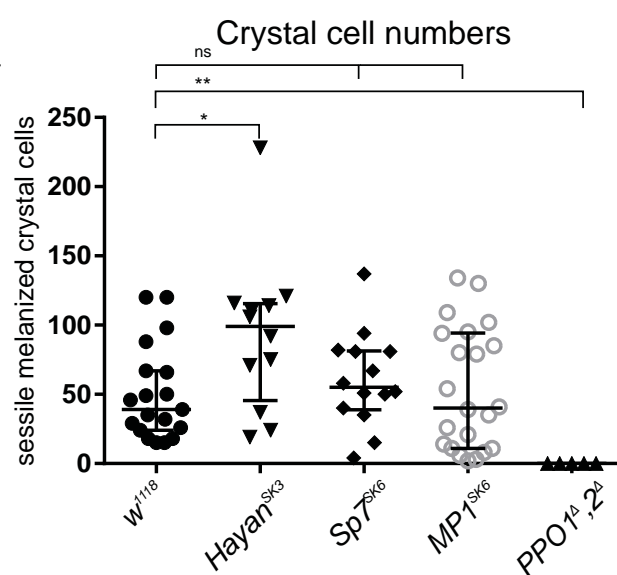

**Fig. S3**

**A**

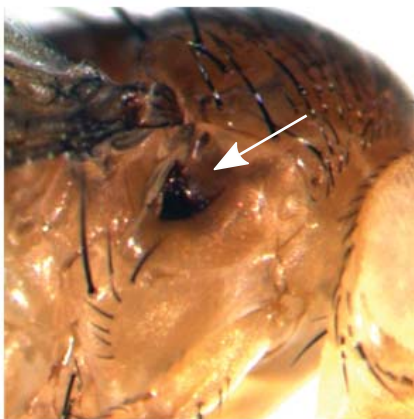

strong

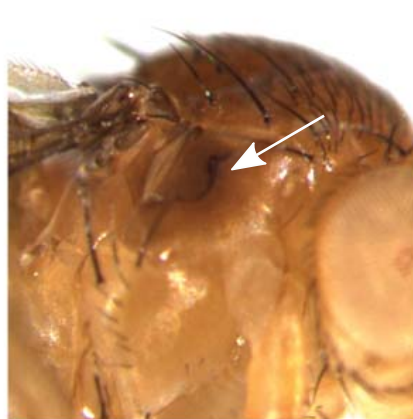

weak

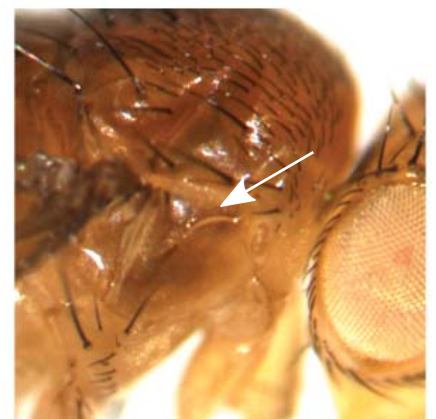

none

# Fig. S4

**A**

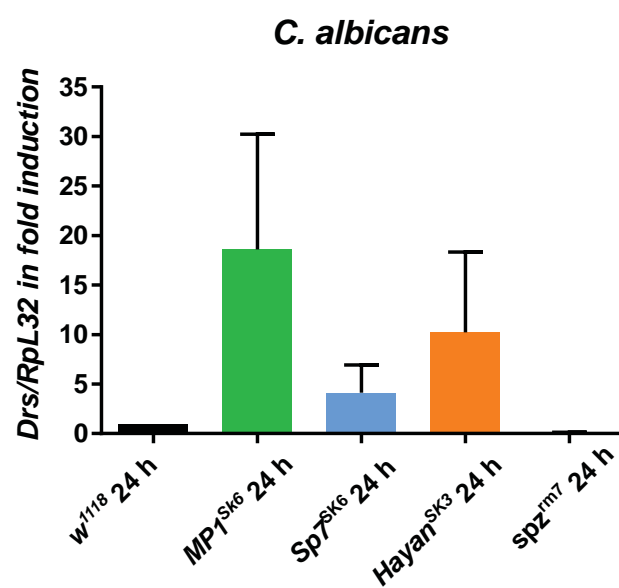

**B**

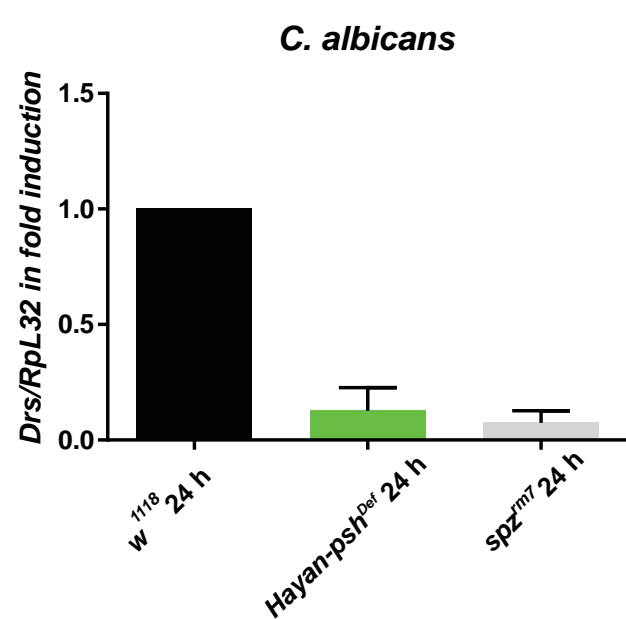

**C**

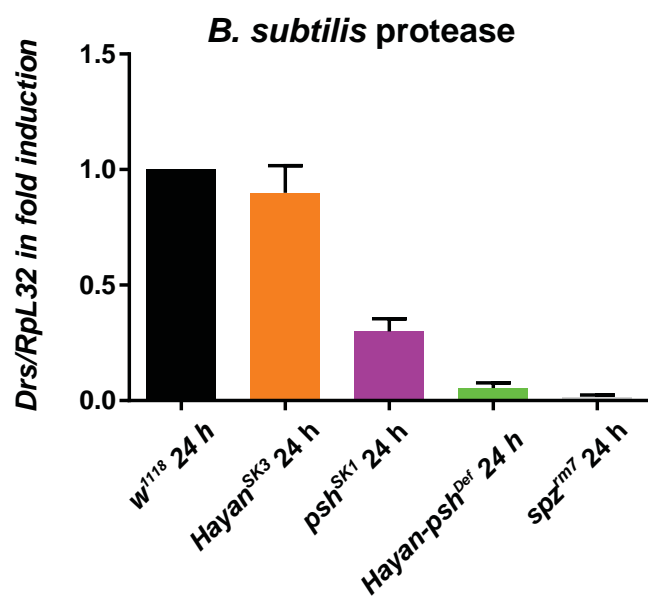

**D**

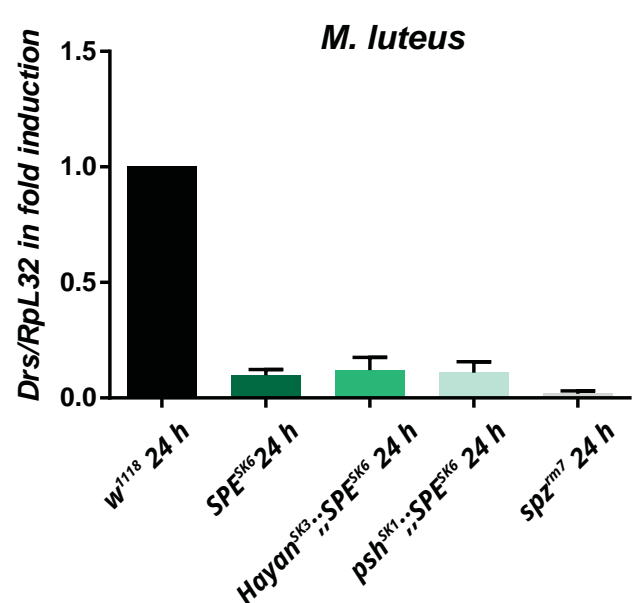

**A**

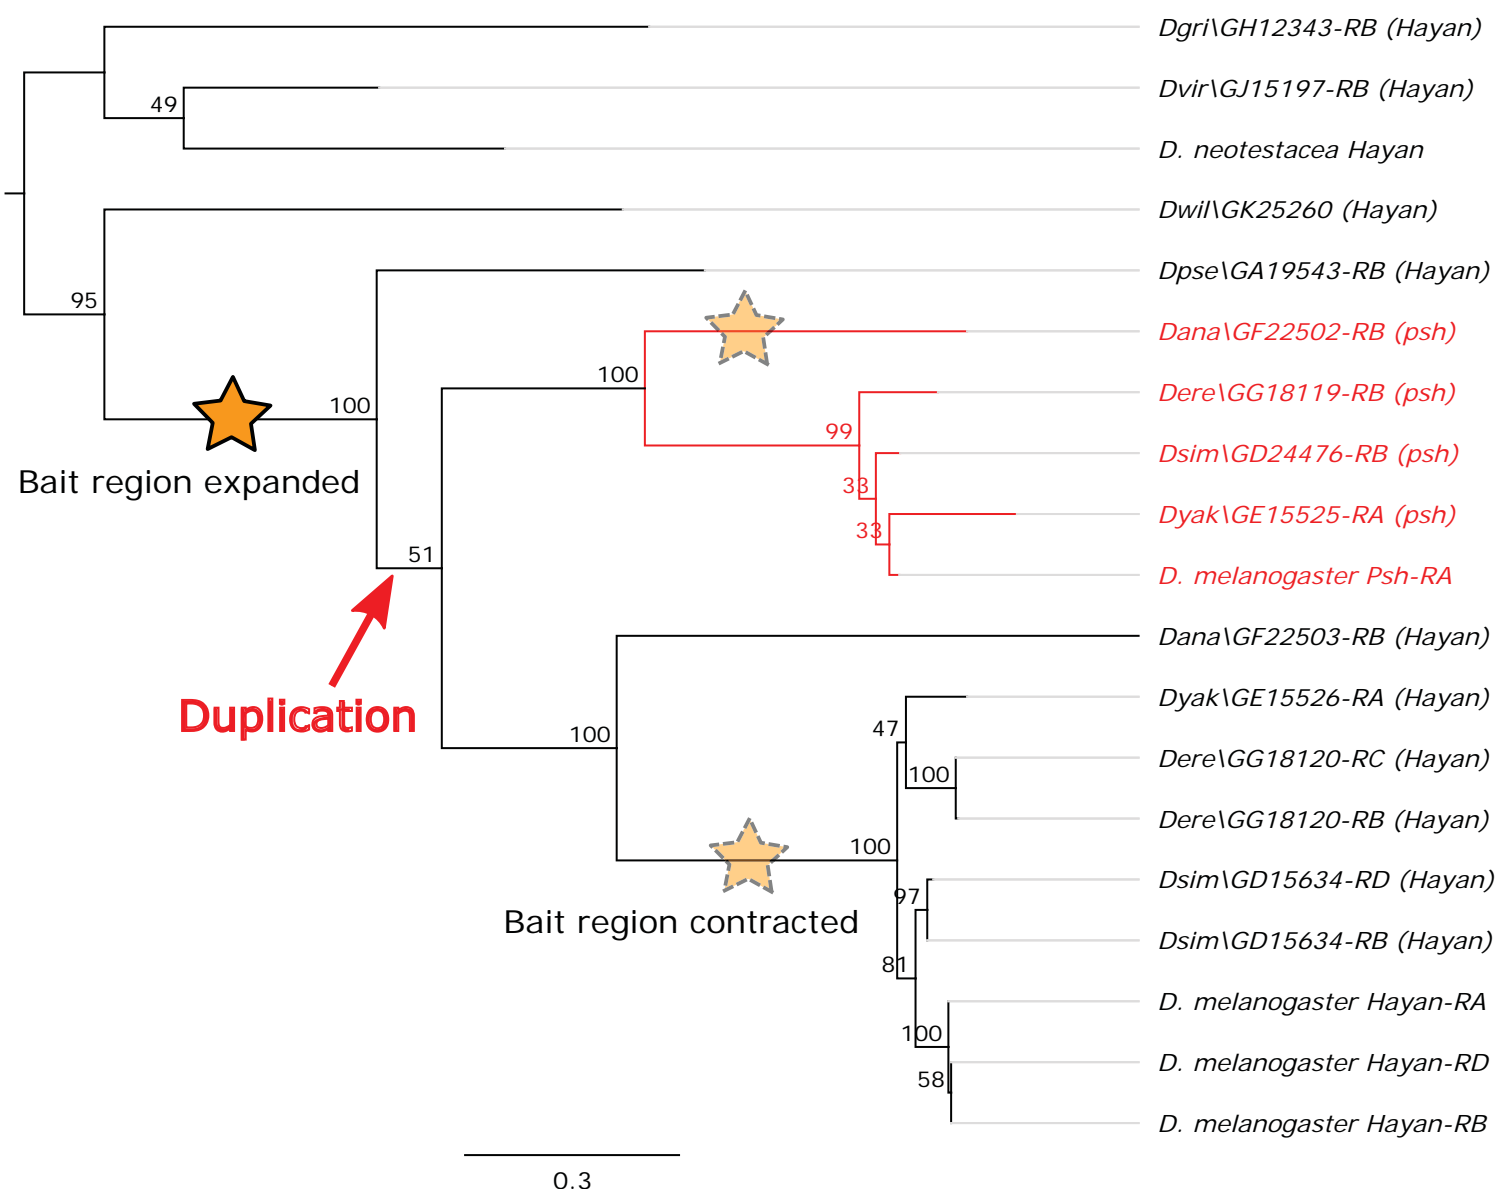

**B**

Consensus sequence

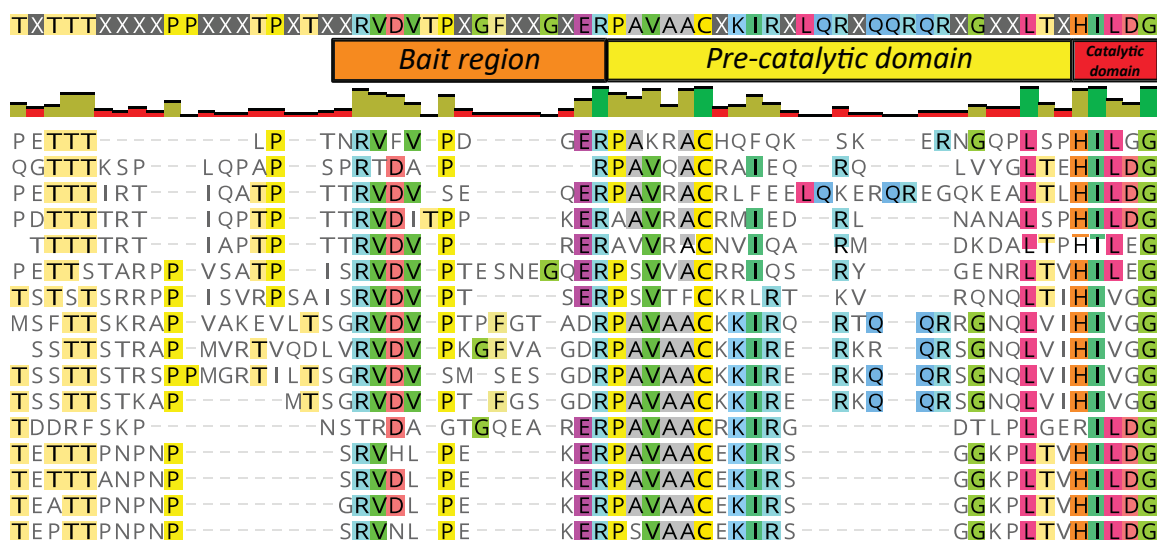

## A *Hayan* isoforms are conserved across *Drosophila*

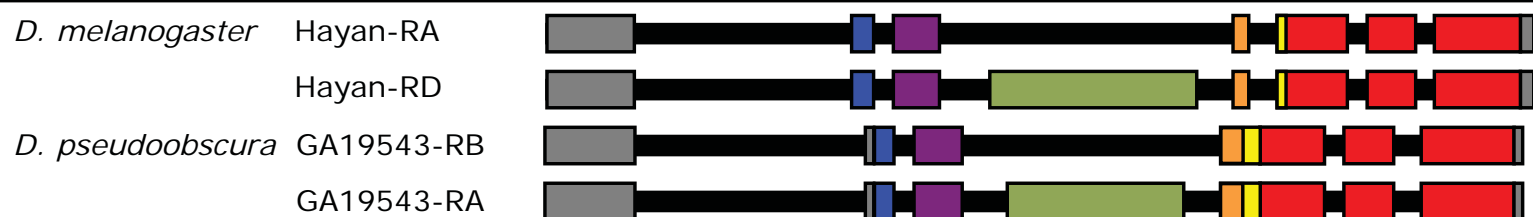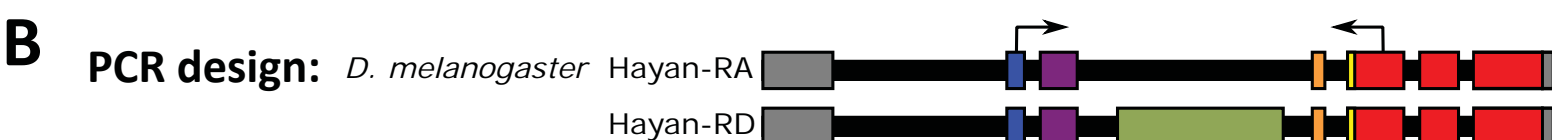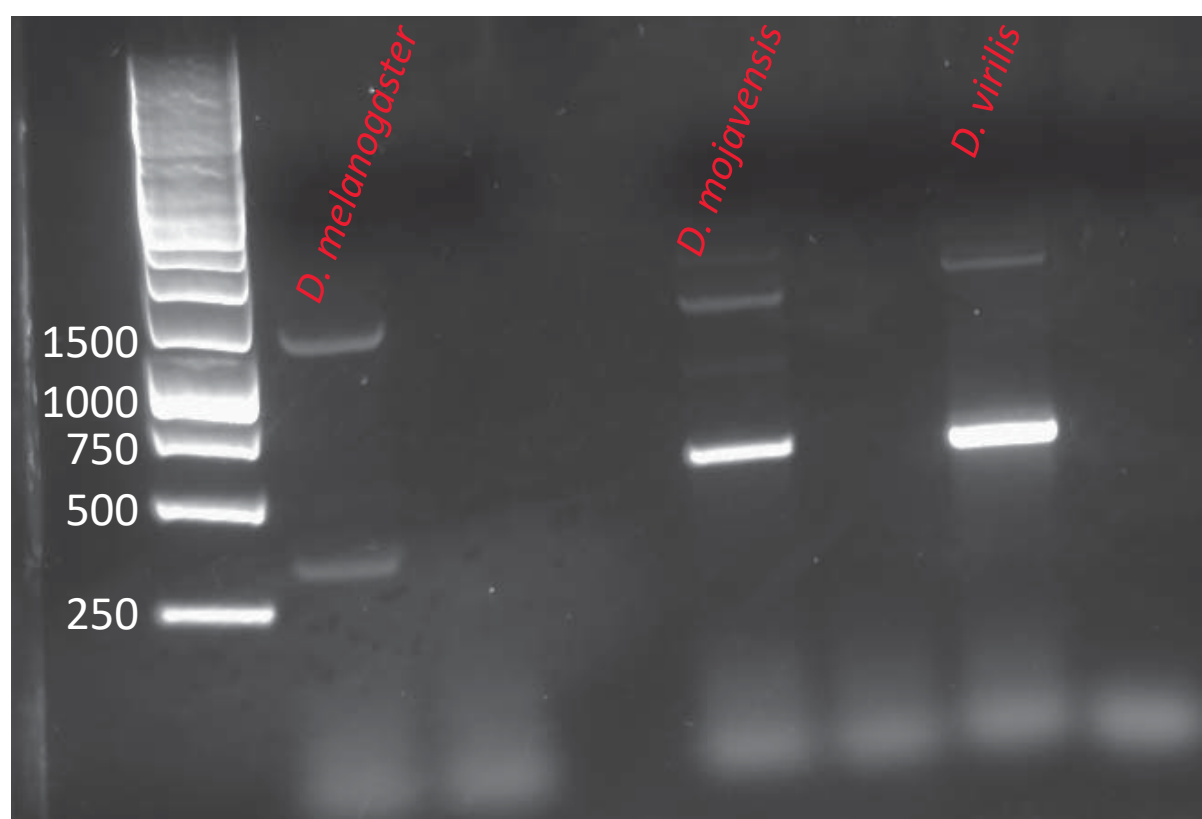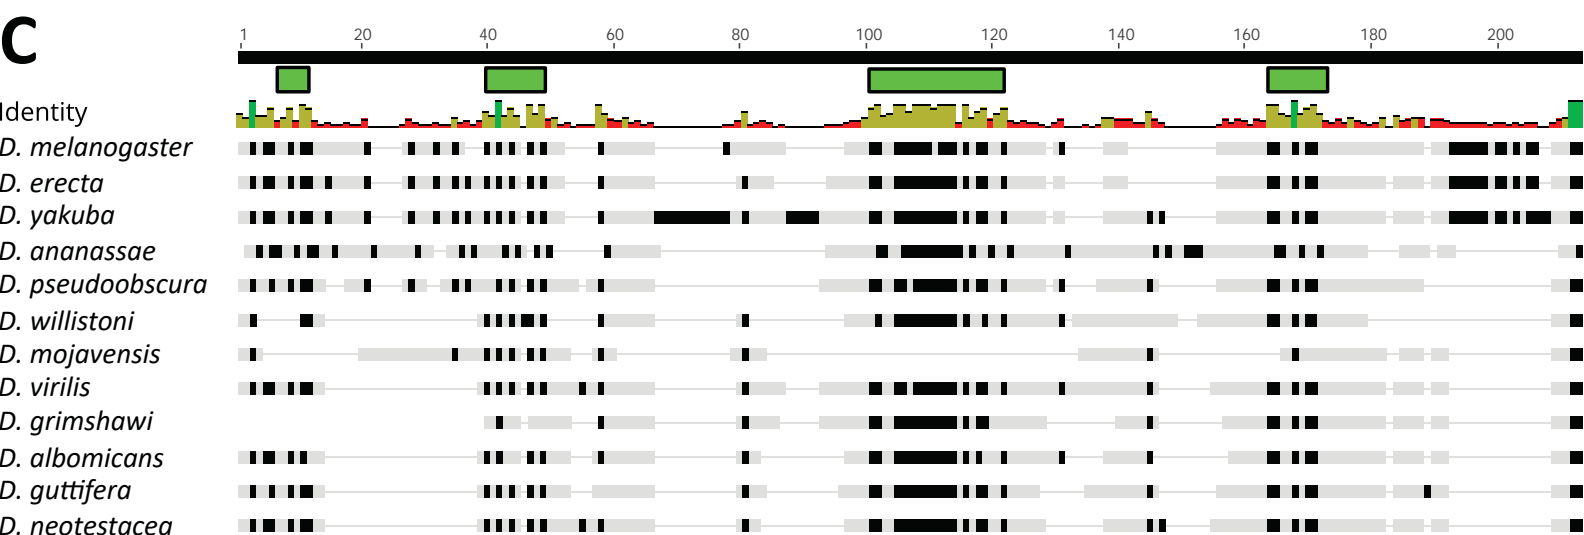

Source: https://www.biorxiv.org/content/10.1101/383257v1.full.pdf
